# Supplementary material for: A metal-free hydrogenation of 3-substituted 2H-1,4-benzoxazines
Source: Royal Society of Chemistry journal article supplement (doi:10.1039/c6ob01556e), 2016-01-01
Supplement: c6ob01556e1.pdf [file c6ob01556e1.pdf]

**A metal-free hydrogenation of 3-substituted 2H-1,4-benzoxazines**

Simin Wei,<sup>a,b</sup> Xiangqing Feng<sup>a,b</sup> and Haifeng Du<sup>a,b</sup> \*

*<sup>a</sup> Beijing National Laboratory for Molecular Sciences, CAS Key Laboratory of Molecular Recognition and Function, Institute of Chemistry, Chinese Academy of Sciences, Beijing 100190, P. R. China*

*<sup>b</sup> University of Chinese Academy of Sciences, Beijing 100049, P.R.China*

**Supporting Information**

**General consideration:** All air-sensitive compounds were handled under an atmosphere of argon or in a nitrogen-filled glovebox.  $^1\text{H}$  NMR and  $^{13}\text{C}$  NMR spectra were recorded on Bruker AV 400 at ambient temperature with  $\text{CDCl}_3$  as solvent and TMS as internal standard. Chemical shifts ( $\delta$ ) were given in ppm, referenced to the residual proton resonance of TMS (0), to the carbon resonance of the  $\text{CDCl}_3$  (77.23). Coupling constants ( $J$ ) were given in Hertz (Hz). IR spectrums were recorded on Perkin-Elmer-983 spectrometer. Optical rotations were measured with PerkinElmer 341 polarimeter. Flash column chromatography was performed on silica gel (200-300 mesh). All solvents were purified by conventional methods, distilled before use. Commercially available reagents were used without further purification.

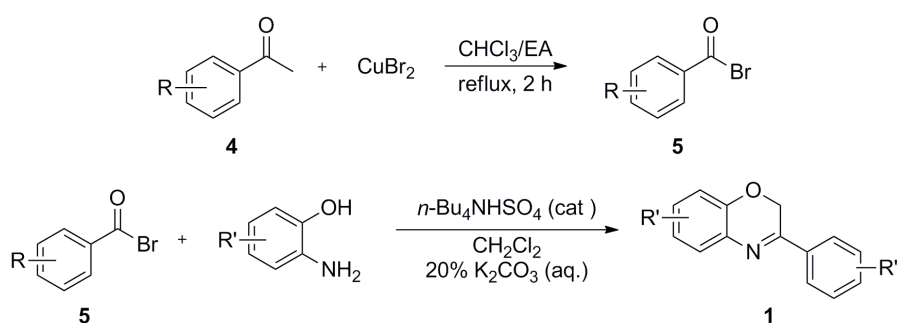

**Representative procedure for the synthesis of 1,4-benzoxazines 1:** To a round-bottomed bottle were added ketone **4** (25 mmol), copper (II) bromide (11.17 g, 50 mmol) and  $\text{CHCl}_3/\text{EA} = 1/1$  (v/v) (25 mL), and the resulting mixture was refluxed for 2 h. The reaction was cooled to room temperature, then the solid was filtered and washed three times by EA. Removal of the solvents *in vacuo*, the residue was used directly without further purification. To a round-bottomed bottle contained 2-aminophenol (10 mmol) and  $\text{CH}_2\text{Cl}_2$  (40 mL), 20% aqueous  $\text{K}_2\text{CO}_3$  solution (70 mL) and  $n\text{-Bu}_4\text{NHSO}_4$  (0.0030 g) were added. The solution of compound **5** (10 mmol) in  $\text{CH}_2\text{Cl}_2$  (30 mL) was added dropwise to the reaction mixture, and the reaction mixture was stirred at room temperature and monitored by TLC. After the

consumption of starting material, organic layer was separated and the aqueous layer was extracted with CH<sub>2</sub>Cl<sub>2</sub> (10 mL x 2). The combined organics were washed with water and brine, and then dried over anhydrous Na<sub>2</sub>SO<sub>4</sub>. Removal of the solvents *in vacuo*, the residue was purified by flash column chromatography to obtain the corresponding benzoxazines.

K. Gao, C.-B. Yu, D.-S. Wang and Y.-G. Zhou, *Adv. Synth. Catal.*, 2012, **354**, 483.

**General procedure for the metal-free catalytic hydrogenation (Scheme 2):** To a glass test tube (10 mL) were added B(C<sub>6</sub>F<sub>5</sub>)<sub>3</sub> (0.0051 g, 0.010 mmol), 1,4-benzoxazines **1** (0.40 mmol) and dry toluene (0.2 mL). The tube was then moved to a stainless-steel autoclave. After being sealed, the autoclave was purged three times with H<sub>2</sub> and the final pressure of hydrogen was adjusted to 20 bar. The reaction mixture was stirred at 50 °C for 6 h. The reaction mixture was cooled to room temperature, and the solvent was removed under reduced pressure. The crude residue was purified by flash chromatography on silica gel using PE/EA (10/1) as the eluent to give the desired product **2**.

**General procedure for the asymmetric hydrogenation (Scheme 4):** To a glass test tube (10 mL) were added HB(C<sub>6</sub>F<sub>5</sub>)<sub>2</sub> (0.0052 g, 0.015 mmol), chiral diene **3i** (0.0091 g, 0.0075 mmol) and dry CH<sub>2</sub>Cl<sub>2</sub> (0.6 mL). The resulting mixture was stirred for 5 min at room temperature, and 1,4-benzoxazines **1** (0.30 mmol) was added. The tube was then moved to a stainless-steel autoclave. After being sealed, the autoclave was purged three times with H<sub>2</sub> and the final pressure of hydrogen was adjusted to 20 bar. The reaction mixture was stirred at room temperature for 12 h. The solvent was removed under reduced pressure, and the crude residue was purified by flash chromatography on silica gel using PE/EA (10/1) as the eluent to give the desired product **2**.

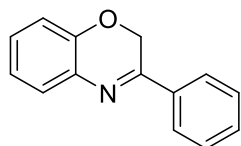

**1a:** Yellow solid;  $^1\text{H}$  NMR (400 MHz,  $\text{CDCl}_3$ , ppm)  $\delta$  7.96-7.88 (m, 2H), 7.56-7.40 (m, 4H), 7.18-7.11 (m, 1H), 7.05-6.99 (m, 1H), 6.94-6.89 (m, 1H), 5.06 (s, 2H);  $^{13}\text{C}$  NMR (100 MHz,  $\text{CDCl}_3$ , ppm)  $\delta$  158.9, 146.6, 135.7, 134.0, 131.4, 129.0, 128.9, 128.1, 126.7, 122.6, 115.8, 63.1.

J. Qin, F. Chen, Y.-M. He and Q.-H. Fan, *Org. Chem. Front.*, 2014, **1**, 952.

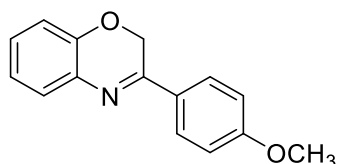

**1b:** Yellow solid;  $^1\text{H}$  NMR (400 MHz,  $\text{CDCl}_3$ , ppm)  $\delta$  7.90 (d,  $J = 8.8$  Hz, 2H), 7.43-7.38 (m, 1H), 7.15-7.09 (m, 1H), 7.05-7.01 (m, 1H), 6.98 (d,  $J = 8.8$  Hz, 2H), 6.94-6.89 (m, 1H), 5.03 (s, 2H), 3.87 (s, 3H);  $^{13}\text{C}$  NMR (100 MHz,  $\text{CDCl}_3$ , ppm)  $\delta$  162.3, 158.3, 146.5, 134.2, 128.4, 128.33, 128.28, 127.7, 122.5, 115.7, 114.3, 62.9, 55.6.

J. Qin, F. Chen, Y.-M. He and Q.-H. Fan, *Org. Chem. Front.*, 2014, **1**, 952.

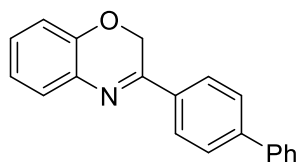

**1c:** Yellow solid;  $^1\text{H}$  NMR (400 MHz,  $\text{CDCl}_3$ , ppm)  $\delta$  8.01 (d,  $J = 8.4$  Hz, 2H), 7.72 (d,  $J = 8.4$  Hz, 2H), 7.68-7.63 (m, 2H), 7.52-7.44 (m, 3H), 7.43-7.34 (m, 1H), 7.20-7.13 (m, 1H), 7.09-7.01 (m, 1H), 6.97-6.91 (m, 1H), 5.11 (s, 2H);  $^{13}\text{C}$  NMR (100 MHz,  $\text{CDCl}_3$ , ppm)  $\delta$  158.4, 146.6, 144.0, 140.3, 134.5, 134.1, 129.1, 128.8, 128.2, 128.0, 127.6, 127.4, 127.2,

122.6, 115.8, 63.1.

J. Qin, F. Chen, Y.-M. He and Q.-H. Fan, *Org. Chem. Front.*, 2014, **1**, 952.

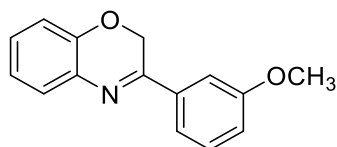

**1d:** Yellow solid;  $^1\text{H}$  NMR (400 MHz,  $\text{CDCl}_3$ , ppm)  $\delta$  7.60-7.52 (m, 1H), 7.50-7.32 (m, 3H), 7.19-7.12 (m, 1H), 7.08-7.01 (m, 2H), 6.95-6.90 (m, 1H), 5.05 (s, 2H), 3.89 (s, 3H);  $^{13}\text{C}$  NMR (100 MHz,  $\text{CDCl}_3$ , ppm)  $\delta$  160.2, 158.6, 146.6, 137.0, 133.9, 129.9, 128.9, 128.0, 122.5, 119.1, 117.7, 115.7, 111.4, 63.2, 55.6.

J. Qin, F. Chen, Y.-M. He and Q.-H. Fan, *Org. Chem. Front.*, 2014, **1**, 952.

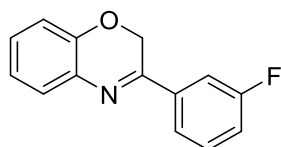

**1e:** Yellow solid;  $^1\text{H}$  NMR (400 MHz,  $\text{CDCl}_3$ , ppm)  $\delta$  7.75-7.67 (m, 1H), 7.66-7.58 (m, 1H), 7.51-7.36 (m, 2H), 7.24-7.12 (m, 2H), 7.08-7.00 (m, 1H), 6.95-6.89 (m, 1H), 5.04 (s, 2H);  $^{13}\text{C}$  NMR (100 MHz,  $\text{CDCl}_3$ , ppm)  $\delta$  163.3 (d,  $J = 245.3$  Hz), 157.4, 146.5, 137.9 (d,  $J = 7.3$  Hz), 133.7, 130.5 (d,  $J = 8.0$  Hz), 129.3, 128.2, 122.7, 122.2 (d,  $J = 2.8$  Hz), 118.3 (d,  $J = 21.4$  Hz), 115.8, 113.6 (d,  $J = 22.7$  Hz), 63.0.

K. Gao, C.-B. Yu, D.-S. Wang and Y.-G. Zhou, *Adv. Synth. Catal.*, 2012, **354**, 483.

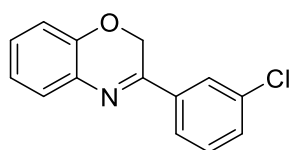

**1f:** Yellow solid;  $^1\text{H}$  NMR (400 MHz,  $\text{CDCl}_3$ , ppm)  $\delta$  7.98-7.91 (m, 1H), 7.76-7.68 (m, 1H), 7.49-7.34 (m, 3H), 7.20-7.13 (m, 1H), 7.06-6.99 (m, 1H), 6.95-6.88 (m, 1H), 5.01 (s, 2H);  $^{13}\text{C}$

NMR (100 MHz, CDCl<sub>3</sub>, ppm)  $\delta$  157.3, 146.5, 137.3, 135.3, 133.7, 131.2, 130.2, 129.3, 128.2, 126.8, 124.6, 122.7, 115.8, 62.9.

J. Qin, F. Chen, Y.-M. He and Q.-H. Fan, *Org. Chem. Front.*, 2014, **1**, 952.

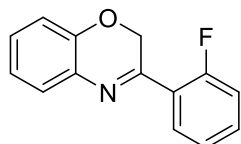

**1g:** Yellow solid; <sup>1</sup>H NMR (400 MHz, CDCl<sub>3</sub>, ppm)  $\delta$  8.06-7.98 (m, 1H), 7.50-7.40 (m, 2H), 7.30-7.21 (m, 1H), 7.20-7.07 (m, 2H), 7.06-6.99 (m, 1H), 6.95-6.89 (m, 1H), 4.98 (d, *J* = 2.6 Hz, 2H); <sup>13</sup>C NMR (100 MHz, CDCl<sub>3</sub>, ppm)  $\delta$  161.9 (d, *J* = 249.3 Hz), 157.6, 132.8 (d, *J* = 8.6 Hz), 129.8 (d, *J* = 3.6 Hz), 129.2, 128.0, 124.9 (d, *J* = 3.0 Hz), 124.5 (d, *J* = 12.7 Hz), 122.6, 116.3 (d, *J* = 22.3 Hz), 115.9, 65.0 (d, *J* = 13.5 Hz).

K. Gao, C.-B. Yu, D.-S. Wang and Y.-G. Zhou, *Adv. Synth. Catal.*, 2012, **354**, 483.

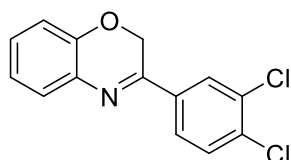

**1h:** Yellow solid; <sup>1</sup>H NMR (400 MHz, CDCl<sub>3</sub>, ppm)  $\delta$  8.08-8.01 (m, 1H), 7.75-7.65 (m, 1H), 7.56-7.49 (m, 1H), 7.45-7.37 (m, 1H), 7.22-7.13 (m, 1H), 7.08-6.99 (m, 1H), 6.95-6.88 (m, 1H), 4.99 (s, 2H); <sup>13</sup>C NMR (100 MHz, CDCl<sub>3</sub>, ppm)  $\delta$  156.2, 146.3, 135.5, 135.4, 133.6, 133.5, 130.9, 129.5, 128.5, 128.2, 125.6, 122.7, 115.8, 62.6.

J. Qin, F. Chen, Y.-M. He and Q.-H. Fan, *Org. Chem. Front.*, 2014, **1**, 952.

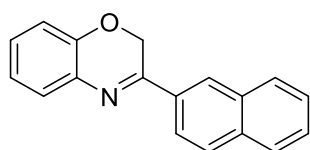

**1i:** Yellow solid;  $^1\text{H}$  NMR (400 MHz,  $\text{CDCl}_3$ , ppm)  $\delta$  8.28-8.22 (m, 1H), 8.20-8.17 (m, 1H), 7.97-7.85 (m, 3H), 7.60-7.46 (m, 3H), 7.22-7.15 (m, 1H), 7.10-7.03 (m, 1H), 6.99-6.94 (m, 1H), 5.19 (s, 2H);  $^{13}\text{C}$  NMR (100 MHz,  $\text{CDCl}_3$ , ppm)  $\delta$  158.5, 146.6, 134.9, 134.1, 133.1, 129.1, 128.9, 128.8, 128.1, 128.0, 127.8, 126.95, 126.86, 123.5, 122.6, 115.8, 63.0.

X.-W. Liu, C. Wang, Y. Yan, Y.-Q. Wang and J. Sun, *J. Org. Chem.*, 2013, **78**, 6276.

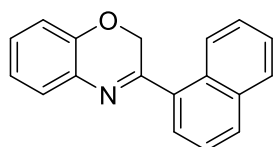

**1j:** Yellow solid;  $^1\text{H}$  NMR (400 MHz,  $\text{CDCl}_3$ , ppm)  $\delta$  8.50-8.41 (m, 1H), 7.99-7.89 (m, 2H), 7.66-7.49 (m, 5H), 7.25-7.19 (m, 1H), 7.11-7.05 (m, 1H), 7.04-6.97 (m, 1H), 5.02 (s, 2H);  $^{13}\text{C}$  NMR (100 MHz,  $\text{CDCl}_3$ , ppm)  $\delta$  162.1, 146.6, 134.7, 134.22, 134.20, 130.9, 130.7, 129.2, 128.8, 128.1, 127.4, 126.6, 126.3, 125.6, 125.2, 122.7, 116.0, 65.8.

X.-W. Liu, C. Wang, Y. Yan, Y.-Q. Wang and J. Sun, *J. Org. Chem.*, 2013, **78**, 6276.

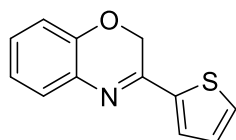

**1k:** Yellow solid;  $^1\text{H}$  NMR (400 MHz,  $\text{CDCl}_3$ , ppm)  $\delta$  7.57-7.51 (m, 1H), 7.44-7.36 (m, 2H), 7.09-7.17 (m, 2H), 7.05-6.97 (m, 1H), 6.95-6.88 (m, 1H), 5.00 (s, 2H);  $^{13}\text{C}$  NMR (100 MHz,  $\text{CDCl}_3$ , ppm)  $\delta$  153.9, 146.7, 141.6, 134.0, 131.0, 128.5, 128.2, 128.1, 127.7, 122.7, 115.8, 63.1.

X.-W. Liu, C. Wang, Y. Yan, Y.-Q. Wang and J. Sun, *J. Org. Chem.*, 2013, **78**, 6276.

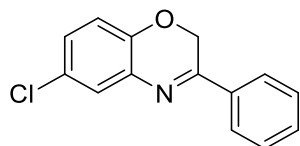

**1l:** Yellow solid;  $^1\text{H}$  NMR (400 MHz,  $\text{CDCl}_3$ , ppm)  $\delta$  7.91 (dd,  $J = 7.6, 1.2$  Hz, 2H), 7.55-7.45 (m, 3H), 7.42 (d,  $J = 2.4$  Hz, 1H), 7.10 (dd,  $J = 8.4, 2.4$  Hz, 1H), 6.85 (d,  $J = 8.4$  Hz, 1H), 5.07 (s, 2H);  $^{13}\text{C}$  NMR (100 MHz,  $\text{CDCl}_3$ , ppm)  $\delta$  159.9, 145.2, 135.2, 134.8, 131.8, 129.0, 128.4, 127.7, 127.1, 126.8, 117.2, 116.8, 63.1.

Z.-P. Chen, M.-W. Chen, R.-N. Guo and Y.-G. Zhou, *Org. Lett.*, 2014, **16**, 1406.

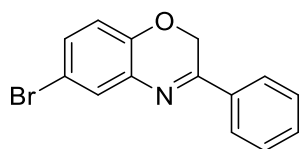

**1m:** Yellow solid;  $^1\text{H}$  NMR (400 MHz,  $\text{CDCl}_3$ , ppm)  $\delta$  7.89-7.86 (m, 2H), 7.56-7.53 (m 1H), 7.52-7.41 (m, 3H), 7.24-7.18 (m, 1H), 6.80-6.79 (m, 1H), 5.02 (s, 2H);  $^{13}\text{C}$  NMR (100 MHz,  $\text{CDCl}_3$ , ppm)  $\delta$  159.8, 145.6, 135.11, 135.09, 131.7, 131.2, 130.5, 129.0, 126.7, 114.1, 63.0.

Z. Zhang, Y. R. Ji, L. Wojtas, W.-Y. Gao, S. Ma, M. J. Zaworotko and J. C. Antilla, *Chem. Commun.*, 2013, **49**, 7693.

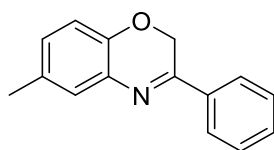

**1n:** Yellow solid;  $^1\text{H}$  NMR (400 MHz,  $\text{CDCl}_3$ , ppm)  $\delta$  7.94-7.88 (m, 2H), 7.50-7.43 (m, 3H), 7.27-7.24 (m, 1H), 6.97-6.92 (m, 1H), 6.83-6.79 (m, 1H), 5.02 (s, 2H), 2.33 (s, 3H);  $^{13}\text{C}$  NMR (100 MHz,  $\text{CDCl}_3$ , ppm)  $\delta$  158.9, 144.3, 135.7, 133.7, 132.0, 131.3, 129.3, 128.9, 128.3, 126.6, 115.3, 63.1, 20.9.

X.-W. Liu, C. Wang, Y. Yan, Y.-Q. Wang and J. Sun, *J. Org. Chem.*, 2013, **78**, 6276.



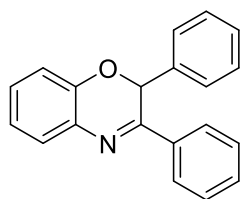

**1o:** White solid;  $^1\text{H}$  NMR (400 MHz,  $\text{CDCl}_3$ , ppm)  $\delta$  7.98-7.83 (m, 2H), 7.50-7.44 (m, 1H), 7.45-7.38 (m, 3H), 7.38-7.31 (m, 2H), 7.30-7.22 (m, 3H), 7.11-7.04 (m, 1H), 7.01-6.95 (m, 1H), 6.85-6.80 (m, 1H), 6.34 (s, 1H);  $^{13}\text{C}$  NMR (100 MHz,  $\text{CDCl}_3$ , ppm)  $\delta$  159.3, 144.7, 136.2, 136.0, 134.1, 131.1, 129.3, 129.1, 129.0, 128.9, 128.3, 127.8, 127.2, 122.4, 116.8, 73.3.

P. G. Baraldi, G. Saponaro, A. R. Moorman, R. Romagnoli, D. Preti, S. Baraldi, E. Ruggiero, K. Varani, M. Targa, F. Vincenzi, P. A. Borea and M. Aghazadeh Tabrizi, *J. Med. Chem.*, 2012, **55**, 6608.

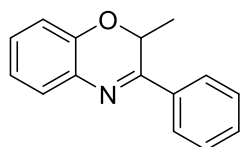

**1p:** White solid;  $^1\text{H}$  NMR (400 MHz,  $\text{CDCl}_3$ , ppm)  $\delta$  8.01-7.94 (m, 2H), 7.51-7.42 (m, 4H), 7.20-7.14 (m, 1H), 7.06-7.00 (m, 1H), 6.96-6.91 (m, 1H), 5.53 (q,  $J = 6.8$  Hz, 1H), 1.41 (d,  $J = 6.8$  Hz, 3H);  $^{13}\text{C}$  NMR (100 MHz,  $\text{CDCl}_3$ , ppm)  $\delta$  161.8, 144.6, 135.4, 133.5, 131.2, 129.0, 128.9, 127.7, 122.3, 116.7, 68.0, 17.1.

P. G. Baraldi, G. Saponaro, A. R. Moorman, R. Romagnoli, D. Preti, S. Baraldi, E. Ruggiero, K. Varani, M. Targa, F. Vincenzi, P. A. Borea and M. Aghazadeh Tabrizi, *J. Med. Chem.*, 2012, **55**, 6608.

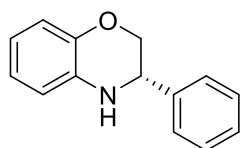

**2a:** Yellow oil; 95% yield; 33% ee;  $[\alpha]_{\text{D}}^{23} = +37.2$  ( $c$  0.60,  $\text{CHCl}_3$ ), [lit.:  $[\alpha]_{\text{D}}^{20} = -118.1$  ( $c$  1.0,

CHCl<sub>3</sub>) (98% ee for *R*-isomer)]; <sup>1</sup>H NMR (400 MHz, CDCl<sub>3</sub>, ppm) δ 7.44-7.30 (m, 5H), 6.88-6.78 (m, 2H), 6.75-6.65 (m, 2H), 4.51 (dd, *J* = 8.4, 2.8 Hz, 1H), 4.32-4.25 (m, 1H), 4.04-3.96 (m, 2H); <sup>13</sup>C NMR (100 MHz, CDCl<sub>3</sub>, ppm) δ 143.7, 139.3, 134.1, 129.0, 128.5, 127.4, 121.6, 119.1, 116.8, 115.5, 71.1, 54.3.

K. Gao, C.-B. Yu, D.-S. Wang and Y.-G. Zhou, *Adv. Synth. Catal.*, 2012, **354**, 483.

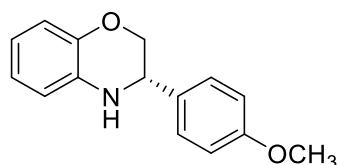

**2b**: White solid; 99% yield; 40% ee, [ $\alpha$ ]<sub>D</sub><sup>23</sup> = +40.1 (*c* 0.63, CHCl<sub>3</sub>), [lit.: [ $\alpha$ ]<sub>D</sub><sup>20</sup> = -126.5 (*c* 1.0, CHCl<sub>3</sub>) (98% ee for *R*-isomer)]; <sup>1</sup>H NMR (400 MHz, CDCl<sub>3</sub>, ppm) δ 7.37-7.31 (m, 2H), 6.99-6.93 (m, 2H), 6.91-6.87 (m, 1H), 6.87-6.81 (m, 1H), 6.77-6.71 (m, 1H), 6.71-6.65 (m, 1H), 4.46 (dd, *J* = 8.8, 2.4 Hz, 1H), 4.27 (dd, *J* = 10.8, 6.4 Hz, 1H), 4.04-3.94 (m, 2H), 3.83 (s, 3H); <sup>13</sup>C NMR (100 MHz, CDCl<sub>3</sub>, ppm) δ 159.7, 143.6, 134.2, 131.3, 128.5, 121.6, 119.0, 116.7, 115.5, 114.3, 71.2, 55.4, 53.7.

J. Qin, F. Chen, Y.-M. He and Q.-H. Fan, *Org. Chem. Front.*, 2014, **1**, 952.

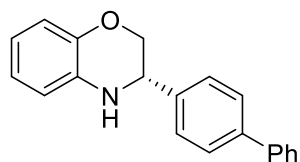

**2c**: White solid; 90% yield; 42% ee, [ $\alpha$ ]<sub>D</sub><sup>23</sup> = +27.2 (*c* 0.60, CHCl<sub>3</sub>), [lit.: [ $\alpha$ ]<sub>D</sub><sup>20</sup> = +44.8 (*c* 1.04, CHCl<sub>3</sub>) (86% ee for *S*-isomer)]; <sup>1</sup>H NMR (400 MHz, CDCl<sub>3</sub>, ppm) δ 7.68-7.60 (m, 4H), 7.55-7.46 (m, 4H), 7.44-7.37 (m, 1H) 6.95-6.90 (m, 1H), 7.90-7.84 (m, 1H), 6.81-6.70 (m, 2H), 4.57 (dd, *J* = 8.4, 2.6 Hz, 1H), 4.30 (dd, *J* = 10.6, 2.6 Hz, 1H), 4.11-4.03 (m, 2H); <sup>13</sup>C

NMR (100 MHz, CDCl<sub>3</sub>, ppm)  $\delta$  143.7, 141.5, 140.7, 138.3, 134.0, 129.0, 127.8, 127.7, 127.6, 127.3, 121.7, 119.1, 116.8, 115.6, 71.1, 54.1.

K. Gao, C.-B. Yu, D.-S. Wang and Y.-G. Zhou, *Adv. Synth. Catal.*, 2012, **354**, 483.

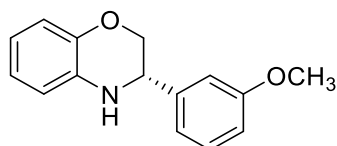

**2d**: Yellow oil; 92% yield; 33% ee,  $[\alpha]_D^{23} = +21.5$  (*c* 0.63, CHCl<sub>3</sub>), [lit.:  $[\alpha]_D^{20} = +84.6$  (*c* 0.87, CHCl<sub>3</sub>) (87% ee for *S*-isomer)]; <sup>1</sup>H NMR (400 MHz, CDCl<sub>3</sub>, ppm)  $\delta$  7.35-7.28 (m, 1H), 7.02-6.95 (m, 2H), 6.92-6.75 (m, 3H), 6.76-6.65 (m, 2H), 4.49 (dd, *J* = 8.8, 2.8 Hz, 1H), 4.30 (dd, *J* = 10.4, 2.8 Hz, 1H), 4.06-3.96 (m, 2H), 3.83 (s, 3H); <sup>13</sup>C NMR (100 MHz, CDCl<sub>3</sub>, ppm)  $\delta$  160.14, 143.6, 140.9, 134.0, 129.9, 121.6, 119.6, 119.0, 116.7, 115.5, 113.8, 112.8, 71.1, 55.4, 54.3.

K. Gao, C.-B. Yu, D.-S. Wang and Y.-G. Zhou, *Adv. Synth. Catal.*, 2012, **354**, 483.

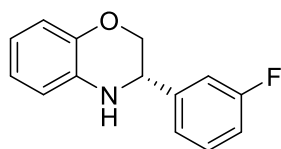

**2e**: Colorless oil; 92% yield; 31% ee,  $[\alpha]_D^{23} = +30.2$  (*c* 0.60, CHCl<sub>3</sub>), [lit.:  $[\alpha]_D^{20} = +58.7$  (*c* 1.12, CHCl<sub>3</sub>) (85% ee for *S*-isomer)]; <sup>1</sup>H NMR (400 MHz, CDCl<sub>3</sub>, ppm)  $\delta$  7.42-7.34 (m, 1H), 7.24-7.18 (m, 1H), 7.18-7.13 (m, 1H), 7.11-7.03 (m, 1H), 7.93-7.83 (m, 2H), 6.79-7.69 (m, 2H), 4.51 (d, *J* = 8.0 Hz, 1H), 4.30 (d, *J* = 10.6 Hz, 1H), 4.05-3.95 (m, 2H); <sup>13</sup>C NMR (100 MHz, CDCl<sub>3</sub>, ppm)  $\delta$  163.3 (d, *J* = 245.0 Hz), 143.6, 142.1 (d, *J* = 6.9 Hz), 133.7, 130.5 (d, *J* = 8.1 Hz), 122.9 (d, *J* = 2.8 Hz), 121.8, 119.3, 116.8, 115.6, 115.3 (d, *J* = 21.1 Hz), 114.2 (d, *J* = 22.0 Hz), 70.8, 53.8 (d, *J* = 1.3 Hz).

K. Gao, C.-B. Yu, D.-S. Wang and Y.-G. Zhou, *Adv. Synth. Catal.*, 2012, **354**, 483.

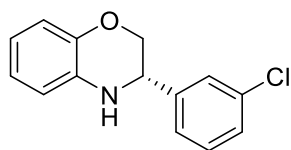

**2f:** Yellow oil; 97% yield; 30% ee,  $[\alpha]_{\text{D}}^{23} = +26.2$  ( $c$  0.61,  $\text{CHCl}_3$ ), [lit.:  $[\alpha]_{\text{D}}^{20} = +71.0$  ( $c$  1.38,  $\text{CHCl}_3$ ) (88% ee for *S*-isomer)];  $^1\text{H}$  NMR (400 MHz,  $\text{CDCl}_3$ , ppm)  $\delta$  7.42 (s, 1H), 7.35-7.25 (m, 3H), 6.92-6.80 (m, 2H), 6.79-6.67 (m, 2H), 4.48 (dd,  $J = 8.2, 1.6$  Hz, 1H), 4.31-4.25 (m, 1H), 4.03-3.94 (m, 2H);  $^{13}\text{C}$  NMR (100 MHz,  $\text{CDCl}_3$ , ppm)  $\delta$  143.6, 141.5, 134.9, 133.6, 130.2, 128.6, 127.5, 125.5, 121.8, 119.3, 116.8, 115.7, 70.8, 53.9.

K. Gao, C.-B. Yu, D.-S. Wang and Y.-G. Zhou, *Adv. Synth. Catal.*, 2012, **354**, 483.

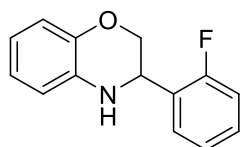

**2g:** Colorless oil; 98% yield;  $^1\text{H}$  NMR (400 MHz,  $\text{CDCl}_3$ , ppm)  $\delta$  7.52-7.45 (m, 1H), 7.73-7.26 (m, 1H), 7.20-7.13 (m, 1H), 7.12-7.04 (m, 1H), 6.89-6.79 (m, 2H), 6.75-6.67 (m, 2H), 4.95-4.89 (m, 1H), 4.36 (dd,  $J = 10.8, 2.8$  Hz, 1H), 4.04 (dd,  $J = 10.6, 7.2$  Hz, 1H), 3.95 (brs, 1H);  $^{13}\text{C}$  NMR (100 MHz,  $\text{CDCl}_3$ , ppm)  $\delta$  160.5 (d,  $J = 245.3$ ), 143.7, 133.8, 129.6 (d,  $J = 8.2$  Hz), 128.3 (d,  $J = 3.9$  Hz), 126.7 (d,  $J = 12.7$  Hz), 124.8 (d,  $J = 3.6$  Hz), 121.8, 119.2, 116.9, 115.7, 115.6 (d,  $J = 21.4$  Hz), 69.2, 47.3 (d,  $J = 3.5$  Hz).

K. Gao, C.-B. Yu, D.-S. Wang and Y.-G. Zhou, *Adv. Synth. Catal.*, 2012, **354**, 483.

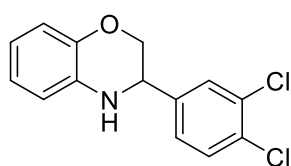

**2h:** Yellow oil; 96% yield;  $^1\text{H}$  NMR (400 MHz,  $\text{CDCl}_3$ , ppm)  $\delta$  7.53-7.49 (m, 1H), 7.48-7.43 (m, 1H), 7.27-7.21 (m, 1H), 6.87-6.79 (m, 2H), 6.76-6.67 (m, 2H), 4.52-4.45 (m, 1H), 4.29-4.21 (m, 1H), 4.02-3.90 (m, 2H);  $^{13}\text{C}$  NMR (100 MHz,  $\text{CDCl}_3$ , ppm)  $\delta$  143.5, 139.7, 133.4, 133.1, 132.3, 130.9, 129.2, 126.6, 121.9, 119.4, 116.8, 115.7, 70.5, 53.3.

K. Gao, C.-B. Yu, D.-S. Wang and Y.-G. Zhou, *Adv. Synth. Catal.*, 2012, **354**, 483.

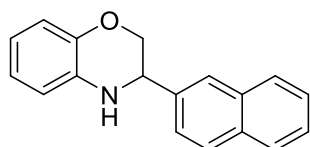

**2i:** White solid; 90% yield;  $^1\text{H}$  NMR (400 MHz,  $\text{CDCl}_3$ , ppm)  $\delta$  7.91-7.82 (m, 4H),  $\delta$  7.55-7.47 (m, 3H), 6.93-6.82 (m, 2H), 6.77-6.70 (m, 2H), 4.71-4.65 (m, 1H), 4.40-4.34 (m, 1H), 4.15-3.05 (m, 2H);  $^{13}\text{C}$  NMR (100 MHz,  $\text{CDCl}_3$ , ppm)  $\delta$  143.7, 136.7, 134.1, 133.5, 133.4, 128.7, 128.1, 127.9, 126.5, 126.4, 126.3, 125.1, 121.7, 119.1, 116.8, 115.6, 71.0, 54.4.

X.-W. Liu, C. Wang, Y. Yan, Y.-Q. Wang and J. Sun, *J. Org. Chem.*, 2013, **78**, 6276.

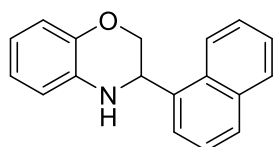

**2j:** White solid; 99% yield;  $^1\text{H}$  NMR (400 MHz,  $\text{CDCl}_3$ , ppm)  $\delta$  8.24-8.18 (m, 1H), 8.00-7.94 (m, 1H) 7.92-7.85 (m, 1H) 7.77-7.70 (m, 1H) 7.62-7.49 (m, 3H), 6.96-6.91 (m, 1H), 6.91-6.84 (m, 1H) 6.81-6.73 (m, 2H), 5.36 (d,  $J = 6.8$  Hz, 1H), 4.53 (d,  $J = 10.8$  Hz, 1H), 4.13 (dd,  $J = 10.8, 6.8$  Hz, 1H), 3.42 (br s, 1H);  $^{13}\text{C}$  NMR (100 MHz,  $\text{CDCl}_3$ , ppm)  $\delta$  143.8, 134.6, 134.3, 133.9, 130.9, 129.3, 128.7, 126.7, 125.9, 125.8, 124.6, 122.4, 121.7, 119.1, 116.8, 115.8, 70.3, 50.3.

X.-W. Liu, C. Wang, Y. Yan, Y.-Q. Wang and J. Sun, *J. Org. Chem.*, 2013, **78**, 6276.

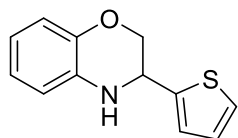

**2k:** Yellow oil; 99% yield;  $^1\text{H}$  NMR (400 MHz,  $\text{CDCl}_3$ , ppm)  $\delta$  7.39-7.28 (m, 1H), 7.14-7.04 (m, 1H), 7.03-6.97 (m, 1H), 6.88-6.79 (m, 2H), 6.75-6.68 (m, 1H), 6.68-6.61 (m, 1H), 4.53-4.47 (m, 1H), 4.29-4.22 (m, 1H), 4.02-3.92 (m, 2H);  $^{13}\text{C}$  NMR (100 MHz,  $\text{CDCl}_3$ , ppm)  $\delta$  143.7, 142.9, 133.2, 127.1, 125.5, 125.0, 121.7, 119.5, 116.8, 115.8, 71.2, 50.3.

X.-W. Liu, C. Wang, Y. Yan, Y.-Q. Wang and J. Sun, *J. Org. Chem.*, 2013, **78**, 6276.

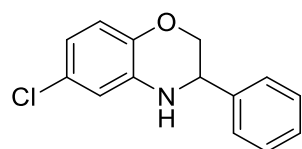

**2l:** Yellow oil; 99% yield;  $^1\text{H}$  NMR (400 MHz,  $\text{CDCl}_3$ , ppm)  $\delta$  7.42-7.31 (m, 5H), 6.80-6.71 (m, 1H), 6.69-6.66 (m, 2H), 4.50 (dd,  $J = 8.4, 2.8$  Hz, 1H), 4.32-4.24 (m, 1H), 4.08 (brs, 1H), 3.96 (dd,  $J = 11.6, 8.4$  Hz, 1H);  $^{13}\text{C}$  NMR (100 MHz,  $\text{CDCl}_3$ , ppm)  $\delta$  142.2, 138.8, 135.0, 120.1, 128.6, 127.3, 126.2, 118.5, 117.6, 114.9, 70.9, 54.1.

Z.-P. Chen, M.-W. Chen, R.-N. Guo and Y.-G. Zhou, *Org. Lett.*, 2014, **16**, 1406.

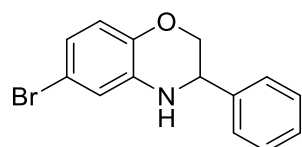

**2m:** Yellow oil; 99% yield;  $^1\text{H}$  NMR (400 MHz,  $\text{CDCl}_3$ , ppm)  $\delta$  7.42-7.30 (m, 5H), 6.80-6.74 (m, 2H), 6.72-6.67 (m, 1H), 4.48 (dd,  $J = 8.4, 2.3$  Hz, 1H), 4.30-4.23 (m, 1H), 4.06 (brs, 1H), 3.94 (dd,  $J = 10.7, 8.4$  Hz, 1H);  $^{13}\text{C}$  NMR (100 MHz,  $\text{CDCl}_3$ , ppm)  $\delta$  142.7, 138.7, 135.4, 129.0, 128.6, 127.3, 121.4, 118.1, 117.7, 113.5, 70.9, 54.0.

Z. Zhang, Y. R. Ji, L. Wojtas, W.-Y. Gao, S. Ma, M. J. Zaworotko and J. C. Antilla, *Chem. Commun.*, 2013, **49**, 7693.

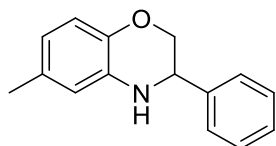

**2n:** Colorless oil; 99% yield;  $^1\text{H}$  NMR (400 MHz,  $\text{CDCl}_3$ , ppm)  $\delta$  7.42-7.32 (m, 5H), 6.84-6.79 (m, 1H), 6.60-6.55 (m, 1H), 6.54 (s, 1H), 4.51 (dd,  $J = 8.4, 2.8$  Hz, 1H), 4.30 (dd,  $J = 10.6, 2.6$  Hz, 1H), 4.05-3.95 (m, 2H), 2.31 (s, 3H);  $^{13}\text{C}$  NMR (100 MHz,  $\text{CDCl}_3$ , ppm)  $\delta$  141.5, 139.5, 133.7, 131.0, 128.9, 128.4, 127.3, 119.6, 116.4, 116.1, 71.1, 54.4, 20.9.

X.-W. Liu, C. Wang, Y. Yan, Y.-Q. Wang and J. Sun, *J. Org. Chem.*, 2013, **78**, 6276.

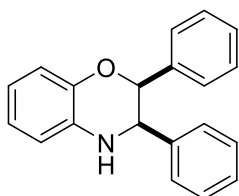

**2o:** White solid, 99% yield;  $^1\text{H}$  NMR (400 MHz,  $\text{CDCl}_3$ , ppm)  $\delta$  7.28-7.09 (m, 6H), 7.04-6.97 (m, 3H), 6.95-6.87 (m, 3H), 6.83-6.71 (m, 2H), 5.46 (d,  $J = 2.8$  Hz, 1H), 4.74-4.67 (m, 1H), 4.29 (brs, 1H);  $^{13}\text{C}$  NMR (100 MHz,  $\text{CDCl}_3$ , ppm)  $\delta$  144.2, 139.5, 137.8, 133.7, 128.1, 128.0, 127.9, 127.8, 127.7, 127.1, 122.1, 118.8, 117.1, 114.9, 79.4, 59.4.

P. G. Baraldi, G. Saponaro, A. R. Moorman, R. Romagnoli, D. Preti, S. Baraldi, E. Ruggiero, K. Varani, M. Targa, F. Vincenzi, P. A. Borea and M. Aghazadeh Tabrizi, *J. Med. Chem.*, 2012, **55**, 6608.

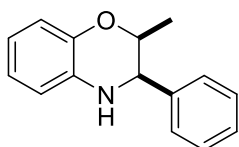

**2p:** Colorless liquid, 98% yield;  $^1\text{H}$  NMR (400 MHz,  $\text{CDCl}_3$ , ppm)  $\delta$  7.42-7.30 (m, 5H), 6.96-6.83 (m, 2H), 6.79-6.71 (m, 1H), 6.71-6.66 (m, 1H), 4.57-4.48 (m, 2H), 4.10 (brs, 1H), 1.15 (d,  $J = 6.4$  Hz, 3H);  $^{13}\text{C}$  NMR (100 MHz,  $\text{CDCl}_3$ , ppm)  $\delta$  143.0, 140.3, 133.4, 128.7,

127.9, 127.6, 121.7, 118.8, 117.1, 115.0, 73.4, 57.8, 15.7.

P. G. Baraldi, G. Saponaro, A. R. Moorman, R. Romagnoli, D. Preti, S. Baraldi, E. Ruggiero, K. Varani, M. Targa, F. Vincenzi, P. A. Borea and M. Aghazadeh Tabrizi, *J. Med. Chem.*, 2012, **55**, 6608.



## The chromatography for the determination of enantiomeric excess

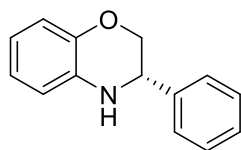

**2a**

**HPLC Conditions:** Column: Chiralcel OD-H, Daicel Chemical Industries, Ltd., Eluent: Hexanes/IPA (70/30); Flow rate: 0.8 mL/min; Detection: UV 254 nm.

### Racemic

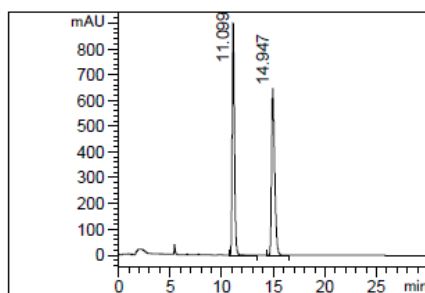

| Peak # | RT [min] | Area % | Area    |
|--------|----------|--------|---------|
| 1      | 11.099   | 49.820 | 1.379e4 |
| 2      | 14.947   | 50.180 | 1.389e4 |

### Chiral

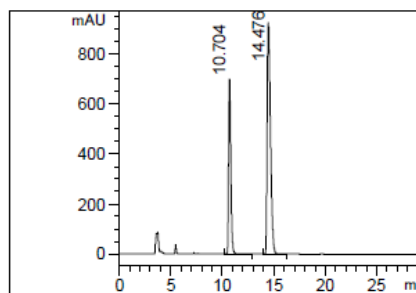

| Peak # | RT [min] | Area % | Area    |
|--------|----------|--------|---------|
| 1      | 10.704   | 33.596 | 1.038e4 |
| 2      | 14.476   | 66.404 | 2.052e4 |

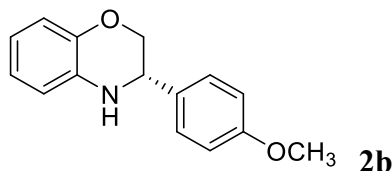

**2b**

**HPLC Conditions:** Column: Chiralcel OD-H, Daicel Chemical Industries, Ltd., Eluent: Hexanes/IPA (70/30); Flow rate: 0.8 mL/min; Detection: UV 254 nm.

### Racemic

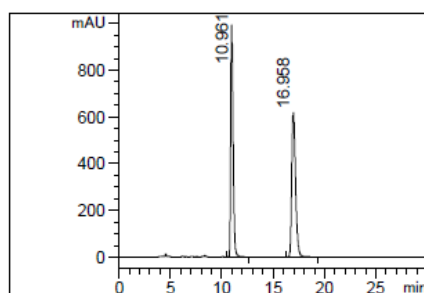

| Peak # | RT [min] | Area % | Area    |
|--------|----------|--------|---------|
| 1      | 10.961   | 49.795 | 1.585e4 |
| 2      | 16.958   | 50.205 | 1.598e4 |

### Chiral

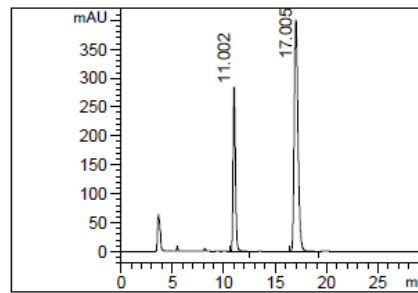

| Peak # | RT [min] | Area % | Area    |
|--------|----------|--------|---------|
| 1      | 11.002   | 30.095 | 4.387e3 |
| 2      | 17.005   | 69.905 | 1.019e4 |

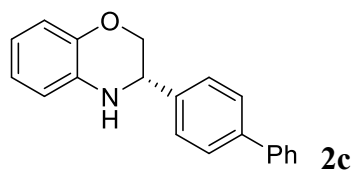

**HPLC Conditions:** Column: Chiralcel OD-H, Daicel Chemical Industries, Ltd., Eluent: Hexanes/IPA (90/10); Flow rate: 1.0 mL/min; Detection: UV 254 nm.

**Racemic**

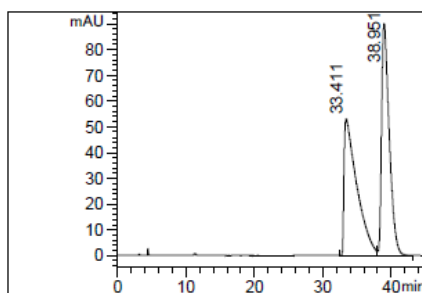

| Peak # | RT [min] | Area % | Area    |
|--------|----------|--------|---------|
| 1      | 33.411   | 49.705 | 6.944e3 |
| 2      | 38.951   | 50.295 | 7.026e3 |

**Chiral**

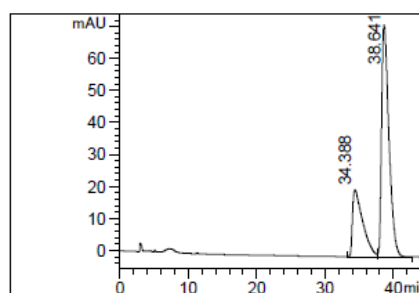

| Peak # | RT [min] | Area % | Area    |
|--------|----------|--------|---------|
| 1      | 34.388   | 28.790 | 2.189e3 |
| 2      | 38.641   | 71.210 | 5.414e3 |

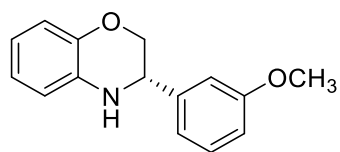

**HPLC Conditions:** Column: Chiralcel OD-H, Daicel Chemical Industries, Ltd., Eluent: Hexanes/IPA (70/30); Flow rate: 0.8 mL/min; Detection: UV 254 nm.

**Racemic**

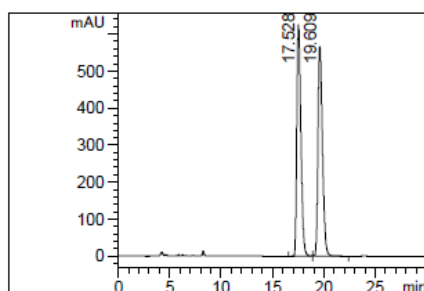

| Peak # | RT [min] | Area % | Area    |
|--------|----------|--------|---------|
| 1      | 17.528   | 49.932 | 1.711e4 |
| 2      | 19.609   | 50.068 | 1.716e4 |

**Chiral**

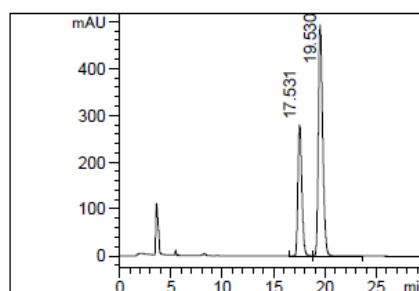

| Peak # | RT [min] | Area % | Area    |
|--------|----------|--------|---------|
| 1      | 17.531   | 33.519 | 7.347e3 |
| 2      | 19.530   | 66.481 | 1.457e4 |

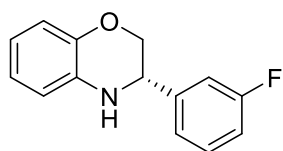

**2e**

**HPLC Conditions:** Column: Chiralcel OD-H, Daicel Chemical Industries, Ltd., Eluent: Hexanes/IPA (70/30); Flow rate: 0.8 mL/min; Detection: UV 254 nm.

**Racemic**

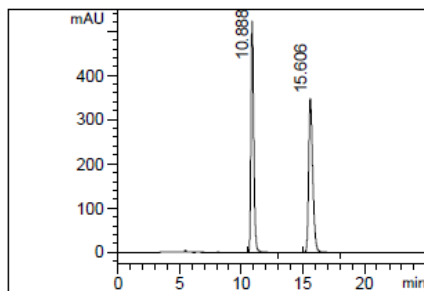

| Peak # | RT [min] | Area % | Area    |
|--------|----------|--------|---------|
| 1      | 10.888   | 49.824 | 8.026e3 |
| 2      | 15.606   | 50.176 | 8.083e3 |

**Chiral**

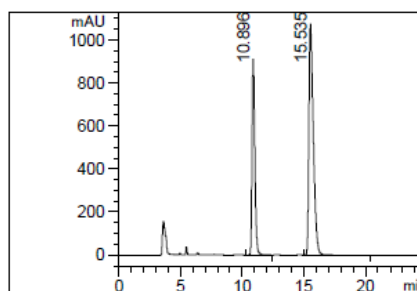

| Peak # | RT [min] | Area % | Area    |
|--------|----------|--------|---------|
| 1      | 10.896   | 34.429 | 1.427e4 |
| 2      | 15.535   | 65.571 | 2.718e4 |

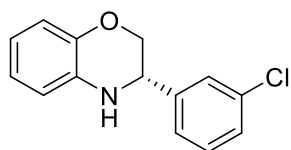

**2f**

**HPLC Conditions:** Column: Chiralcel OD-H, Daicel Chemical Industries, Ltd., Eluent: Hexanes/IPA (70/30); Flow rate: 0.8 mL/min; Detection: UV 254 nm.

**Racemic**

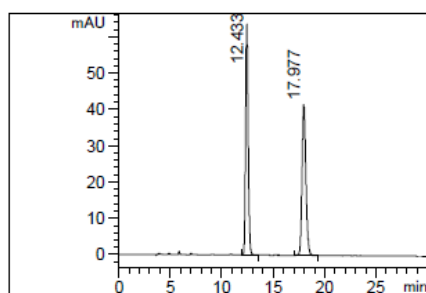

| Peak # | RT [min] | Area % | Area    |
|--------|----------|--------|---------|
| 1      | 12.433   | 50.061 | 1.100e3 |
| 2      | 17.977   | 49.939 | 1.097e3 |

**Chiral**

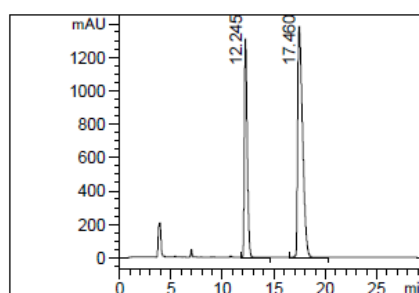

| Peak # | RT [min] | Area % | Area    |
|--------|----------|--------|---------|
| 1      | 12.245   | 35.148 | 2.447e4 |
| 2      | 17.460   | 64.852 | 4.515e4 |

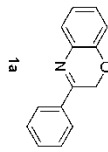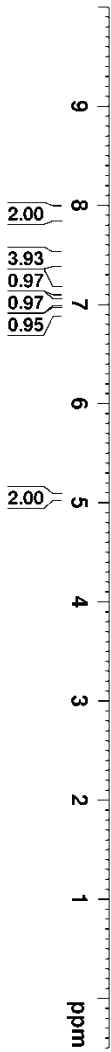

```

NAME wsm-2-H-S
EXPNO 1354
PROCNO 2
Date_ 20160103
Time 7.19
INSTRUM spect
PROBHD 5 mm PABUL
PULPROG zg30
TD 32768
SOLVENT CDCl3
NS 16
DS 0
SWH 12019.230 Hz
FIDRES 0.366798 Hz
AQ 1.3631988 sec
RG 1281
DW 41.600 usec
DE 6.50 usec
TE 300.0 K
Dc 2.00000000 sec
IDC 1

===== CHANNEL f1 =====
SF01 400.320007 MHz
NUC1 1H
P1 12.60 usec
S1 65336
SF 400.330056 MHz
WDW EM
SSB 0
LB 0
GB 0
PC 1.00
  
```

158.88  
 146.56  
 135.69  
 134.01  
 131.36  
 128.98  
 128.86  
 128.05  
 126.65  
 122.57  
 115.76  
 63.11

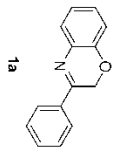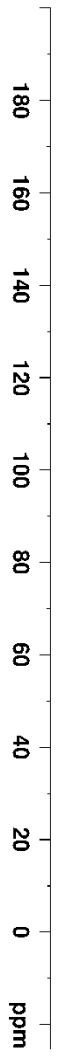

```

NAME: wsm-2-C-S
EXPNO: 1354
PROCNO: 1
DATE_: 20160105
TIME: 7.21
INSTRUM: spect
PROBHD: 5 mm PABUL 13C
PULPROG: zgpg30
TD: 32768
SOLVENT: CDCl3
NS: 65
DS: 0
SWH: 25232.325 Hz
FIDRES: 0.770646 Hz
AQ: 0.6488364 sec
RG: 161
DW: 19.800 usec
DE: 6.50 usec
TE: 300.0 K
D1: 2.00000000 sec
D11: 0.03000000 sec
ID0: 1
----- CHANNEL f1 -----
SFO1: 100.628298 MHz
NUC1: 13C
P1: 9.40 usec
SI: 32768
SF: 100.6127494 MHz
WDW: FM
SSB: 0
LB: 1.00 Hz
GB: 0
PC: 1.40
  
```

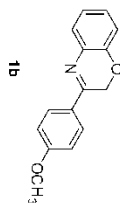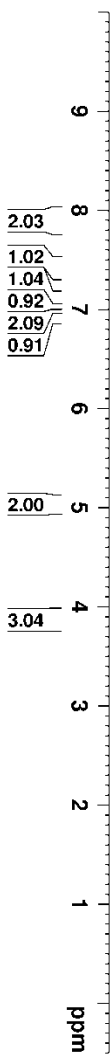

```

NAME wsm-2-H-S
EXPNO 1396
PROCNO 1
Date_ 20151116
Time 13.33
INSTRUM spect
PROBHD 5 mm PABJL
PULPROG zg30
TD 32768
SOLVENT CDCl3
NS 13
DS 0
SWH 12019.230 Hz
FIDRES 0.366798 Hz
AQ 1.3631988 sec
RG 181
DW 41.600 usec
DE 6.50 usec
TE 300.0 K
Dc 2.00000000 sec
IDC 1

===== CHANNEL f1 =====
SFO1 400.320007 MHz
NUC1 1H
P1 12.60 usec
S- 65336
SF 400.330000 MHz
WDW EM
SSB 0
LB 0
GB 0
PC 1.00

```

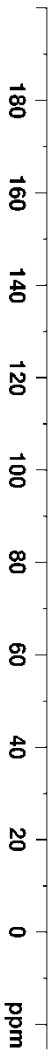

- 160.15
- 158.63
- 146.57
- 137.03
- 133.92
- 129.86
- 128.86
- 128.02
- 122.51
- 119.08
- 117.67
- 115.72
- 111.36

- 63.15
- 55.60

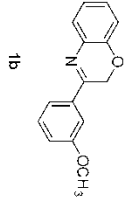

```

NAME: wsm-2-C-S
EXPNO: 1379
PROCNO: 1
Date_ : 20151114
Time: 12:27
INSTRUM: spect
PROBHD: 5 mm PABUL 13C
PULPROG: zgpg30
TD: 32768
SOLVENT: CDCl3
NS: 61
DS: 0
SWH: 25232.325 Hz
FIDRES: 0.770646 Hz
AQ: 0.6488364 sec
RG: 128
DW: 19.800 usec
DE: 6.50 usec
TE: 300.0 K
D1: 2.00000000 sec
D11: 0.03000000 sec
ID0: 1
----- CHANNEL f1 -----
SFO1: 100.628298 MHz
NUC1: 13C
P1: 9.40 usec
SI: 32768
SF: 100.6127538 MHz
WDW: FM
SSB: 0
LB: 1.00 Hz
GB: 0
PC: 1.40
  
```

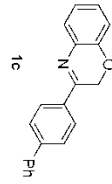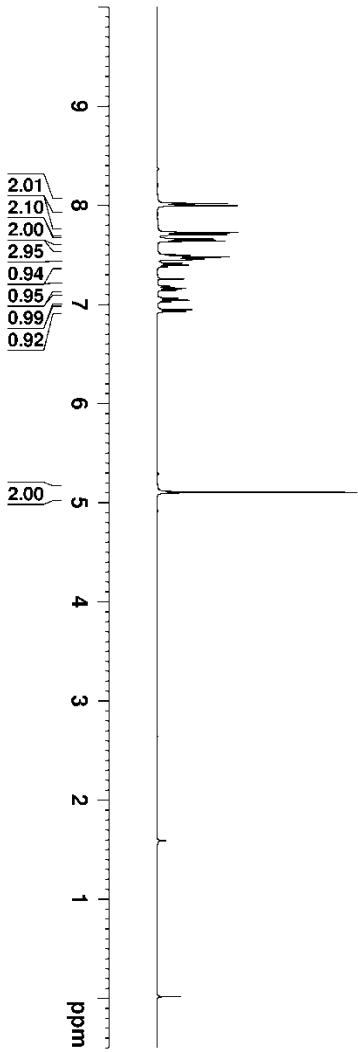

```

NAME wsm-2-H-S
EXPNO 1345
PROCNO 2
Date_ 20151114
Time 12.22
INSTRUM spect
PROBHD 5 mm PABJL
PULPROG zg30
TD 32768
SOLVENT CDCl3
NS 16
DS 0
SWH 12019.230 Hz
FIDRES 0.366798 Hz
AQ 1.3631988 sec
RG 203
DW 41.600 usec
DE 6.50 usec
TE 300.0 K
Dc 2.0000000 sec
IDC 1

===== CHANNEL f1 =====
SF01 400.320007 MHz
NUC1 1H
P1 12.60 usec
S1 65336
SF 400.330099 MHz
WDW EM
SSB 0
LB 0.50 Hz
GB 0
PC 1.00

```



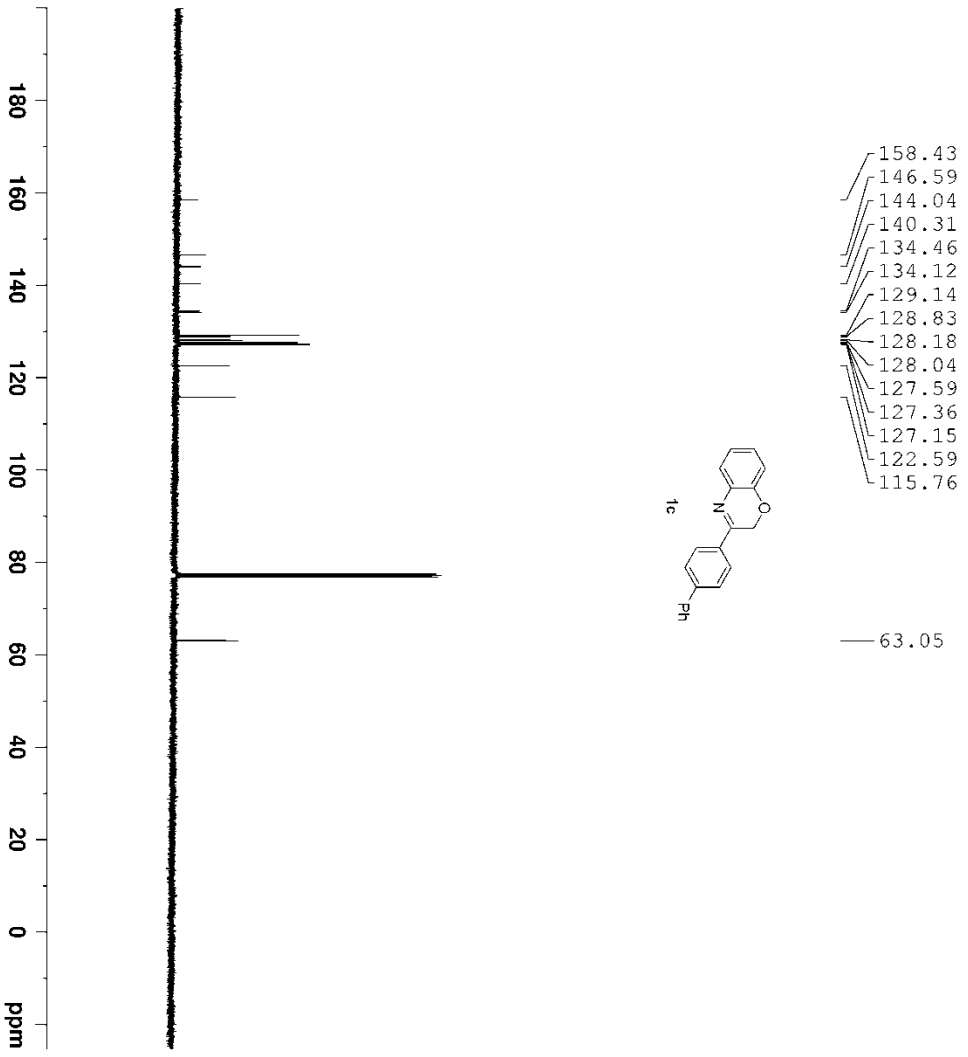

```

NAME: wsm-2-C-S
EXPNO: 1315
PROCNO: 1
Date_ : 20151114
Time: 12.15
INSTRUM: spect
PROBHD: 5 mm PABUL 13C
PULPROG: zgpg30
TD: 32768
SOLVENT: CDCl3
NS: 136
DS: 0
SWH: 25232.325 Hz
FIDRES: 0.770646 Hz
AQ: 0.6488364 sec
RG: 128
DW: 19.800 usec
DE: 6.50 usec
TE: 300.0 K
D1: 2.00000000 sec
D11: 0.03000000 sec
ID0: 1
----- CHANNEL f1 -----
SFO1: 100.628298 MHz
NUC1: 13C
P1: 9.40 usec
SI: 32768
SF: 100.6127495 MHz
WDW: FM
SSB: 0
LB: 1.00 Hz
GB: 0
PC: 1.40

```

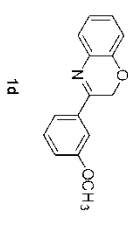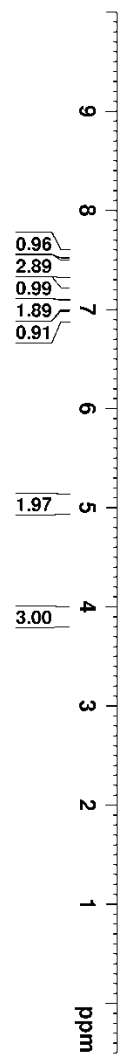

```

NAME          wsm-2-H-S
EXPNO         1379
PROCNO        1
Date_         20151114
Time_         12.25
INSTRUM       spect
PROBHD        5 mm PABJL
PULPROG       zg30
ID            32768
SOLVENT       CDCl3
NS            8
DS            0
SWH           12019.230 Hz
FIDRES        0.366798 Hz
AQ            1.3631988 sec
RG            101
DW            41.600 usec
DE            6.50 usec
TE            300.0 K
Dc            2.00000000 sec
IDC           1

===== CHANNEL f1 =====
SF01          400.320007 MHz
NUC1          1H
P1            12.60 usec
S1            65336
SF            400.3300100 MHz
WDW           EM
SSB           0
LB            0.50 Hz
GB            0
PC            1.00
  
```

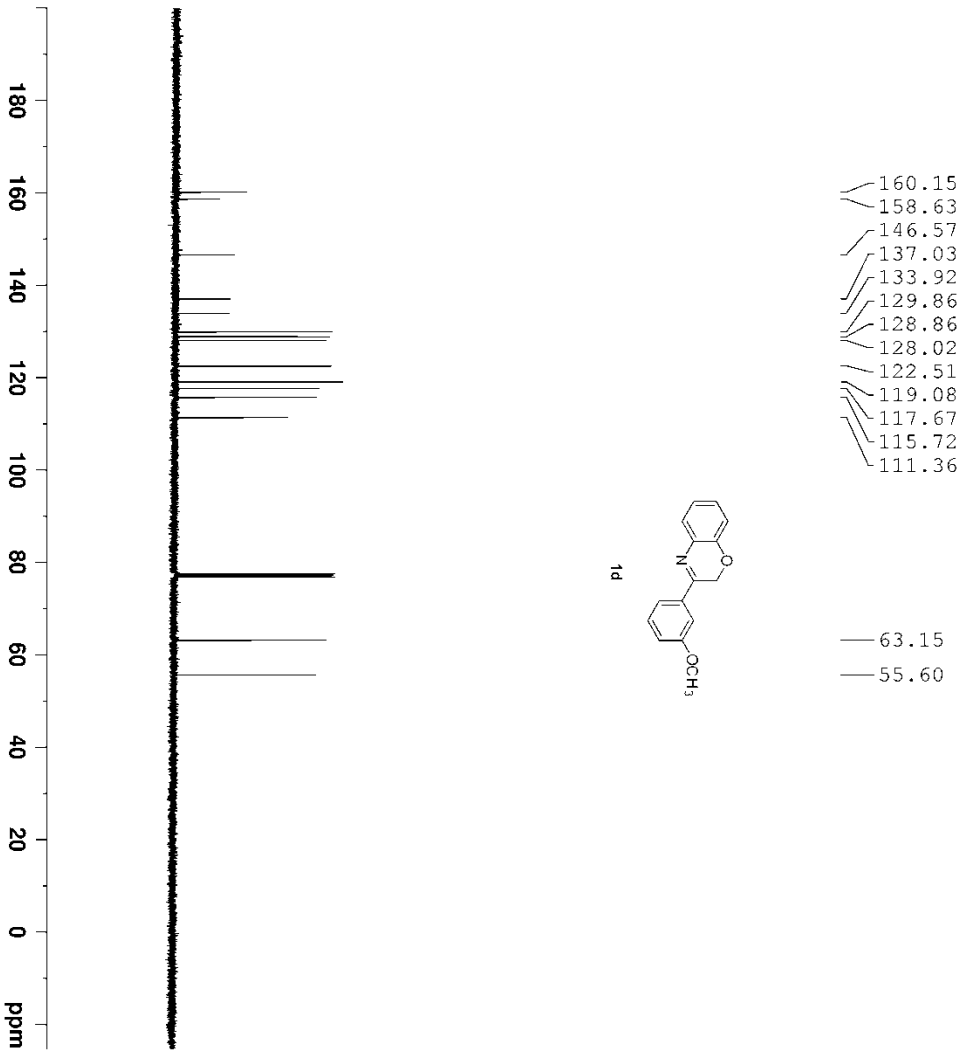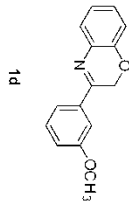

- 160.15
- 158.63
- 146.57
- 137.03
- 133.92
- 129.86
- 128.86
- 128.02
- 122.51
- 119.08
- 117.67
- 115.72
- 111.36

- 63.15
- 55.60

```

NAME: wsm-2-C-S
EXPNO: 1379
PROCNO: 1
Date_ : 20151114
Time: 12:27
INSTRUM: spect
PROBHD: 5 mm PABUL 13C
PULPROG: zgpg30
TD: 32768
SOLVENT: CDCl3
NS: 61
DS: 0
SWH: 25232.325 Hz
FIDRES: 0.770646 Hz
AQ: 0.6488364 sec
RG: 128
DW: 19.800 usec
DE: 6.50 usec
TE: 300.0 K
D1: 2.00000000 sec
D11: 0.03000000 sec
ID0: 1
----- CHANNEL f1 -----
SFO1: 100.628298 MHz
NUC1: 13C
P1: 9.40 usec
SI: 32768
SF: 100.6127538 MHz
WDW: FM
SSB: 0
LB: 1.00 Hz
GB: 0
PC: 1.40

```

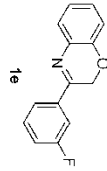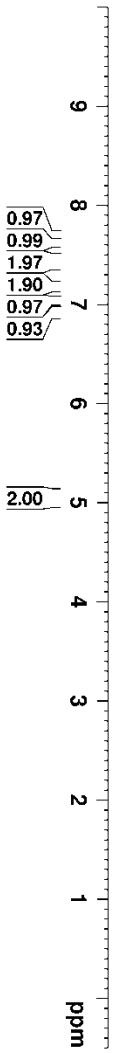

```

NAME wsm-2-H-S
EXPNO 1384
PROCNO 1
Date_ 20151114
Time 12.31
INSTRUM spect
PROBHD 5 mm PABDUL-3C
PULPROG zg30
ID 32768
SOLVENT CDCl3
NS 6
DS 0
SWH 12019.230 Hz
FIDRES 0.366798 Hz
AQ 1.3631988 sec
RG 203
DW 41.600 usec
DE 6.50 usec
TE 300.0 K
Dc 2.00000000 sec
IDC 1

===== CHANNEL f1 =====
SF01 400.320007 MHz
NUC1 1H
P1 12.60 usec
S1 65336
SF 400.330000 MHz
WDW EM
SSB 0
LB 0
GB 0
PC 1.00

```

164.53  
 162.08  
 157.44  
 146.51  
 137.96  
 137.88  
 133.74  
 130.54  
 130.46  
 129.26  
 128.20  
 122.67  
 122.25  
 122.23  
 118.41  
 118.19  
 115.81  
 113.68  
 113.45  
 63.02

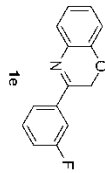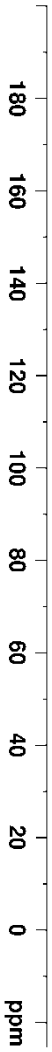

```

NAME: wsm-2-C-S
EXPNO: 1381
PROCNO: 1
Date_ : 20151114
Time: 12.32
INSTRUM: spect
PROBHD: 5 mm PABUL 13C
PULPROG: zgpg30
TD: 32768
SOLVENT: CDCl3
NS: 384
DS: 0
SWH: 25232.325 Hz
FIDRES: 0.770646 Hz
AQ: 0.6488364 sec
RG: 128
DW: 19.800 usec
DE: 6.50 usec
TE: 300.0 K
D1: 2.00000000 sec
D11: 0.03000000 sec
ID0: 1
  
```

```

----- CHANNEL f1 -----
SFO1: 100.628298 MHz
NUC1: 13C
P1: 9.40 usec
SI: 32768
SF: 100.6127487 MHz
WDW: FM
SSB: 0
LB: 1.00 Hz
GB: 0
PC: 1.40
  
```

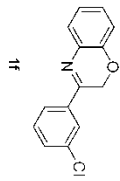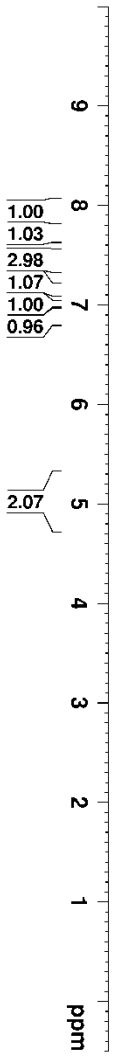

```

NAME          wsm-2-H-S
EXPNO         1435
PROCNO        1
Date_         20160105
Time         7.24
INSTRUM       spect
PROBHD        5 mm 2DUI_13C
PULPROG       zg30
TD            32768
SOLVENT       CDCl3
NS            13
DS            0
SWH           12019.230 Hz
FIDRES        0.366798 Hz
AQ            1.3631988 sec
RG            128
DW            41.600 usec
DE            6.50 usec
TE            300.0 K
D1            2.0000000 sec
D0            1

===== CHANNEL f1 =====
SFO:          400.132007 MHz
NUC1:         1H
P1:           12.60 usec
SI:           65536
SF:           400.1300156 MHz
WDW:          EM
SSB:          0
LB:           0.50 Hz
GB:           0
PC:           1.00

```

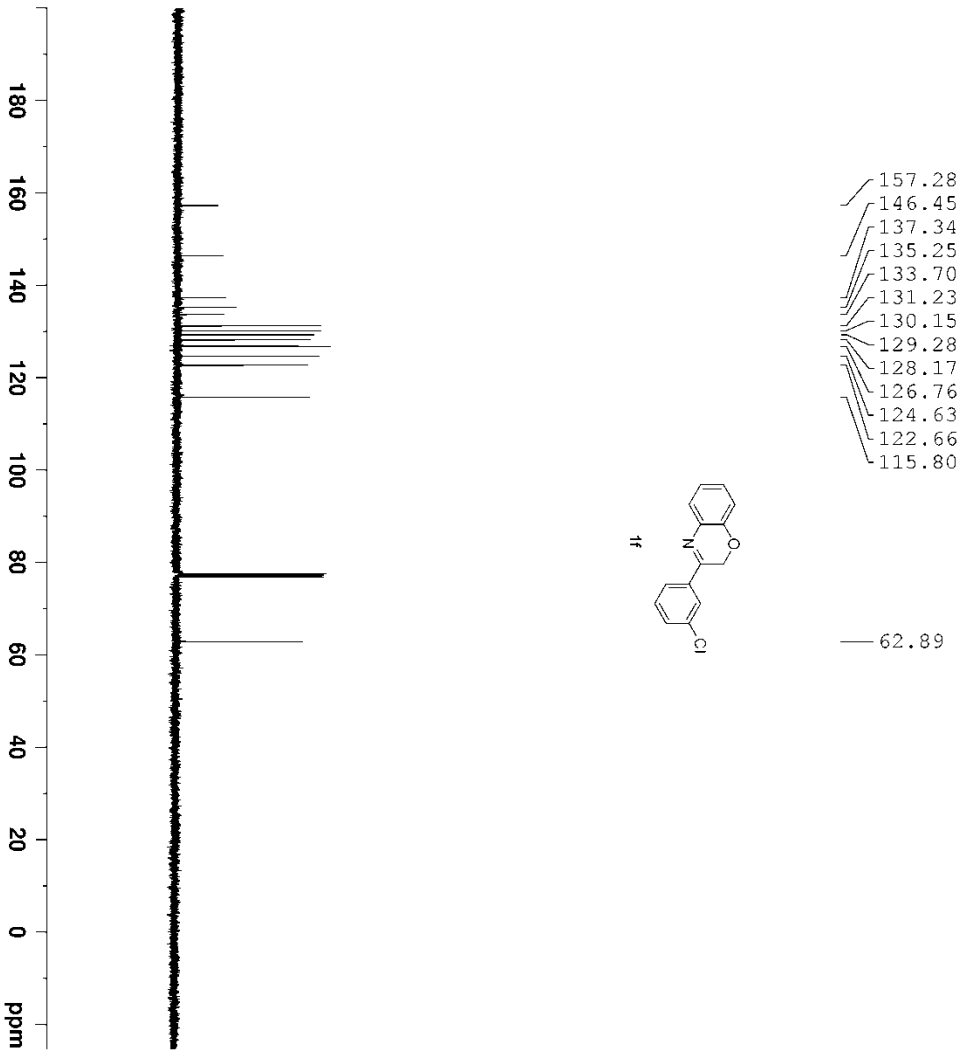

```

NAME: wsm-2-C-S
EXPNO: 135
PROCNO: 1
Date_ : 20160105
Time: 7.26
INSTRUM: spect
PROBHD: 5 mm PABUL 13C
PULPROG: zgpg30
TD: 32768
SOLVENT: CDCl3
NS: 47
DS: 0
SWH: 25232.325 Hz
FIDRES: 0.770646 Hz
AQ: 0.6488364 sec
RG: 161
DW: 19.800 usec
DE: 6.50 usec
TE: 300.0 K
D1: 2.00000000 sec
D11: 0.03000000 sec
ID0: 1
----- CHANNEL f1 -----
SFO1: 100.628298 MHz
NUC1: 13C
P1: 9.40 usec
SI: 32768
SF: 100.6127524 MHz
WDW: FM
SSB: 0
LB: 1.00 Hz
GB: 0
PC: 1.40

```

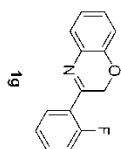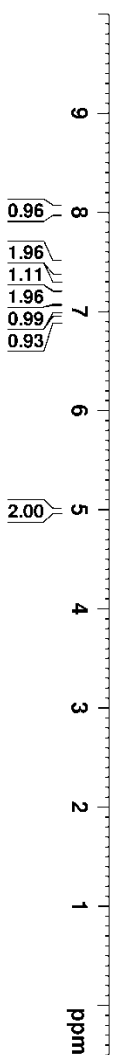

```

NAME wsm-2-H-S
EXPNO 1408
PROCNO 1
Date_ 20151119
Time 4.37
INSTRUM spect
PROBHD 5 mm PABJL
PULPROG zg30
ID 32768
SOLVENT CDCl3
NS 15
DS 0
SWH 12019.230 Hz
FIDRES 0.366798 Hz
AQ 1.3631988 sec
RG 128
DW 41.600 usec
DE 6.50 usec
TE 300.0 K
Dc 2.0000000 sec
IDC 1

===== CHANNEL f1 =====
SF01 400.320007 MHz
NUC1 1H
P1 12.60 usec
S1 65336
SF 400.330069 MHz
WDW EM
SSB 0
LB 0
GB 0
PC 1.00

```



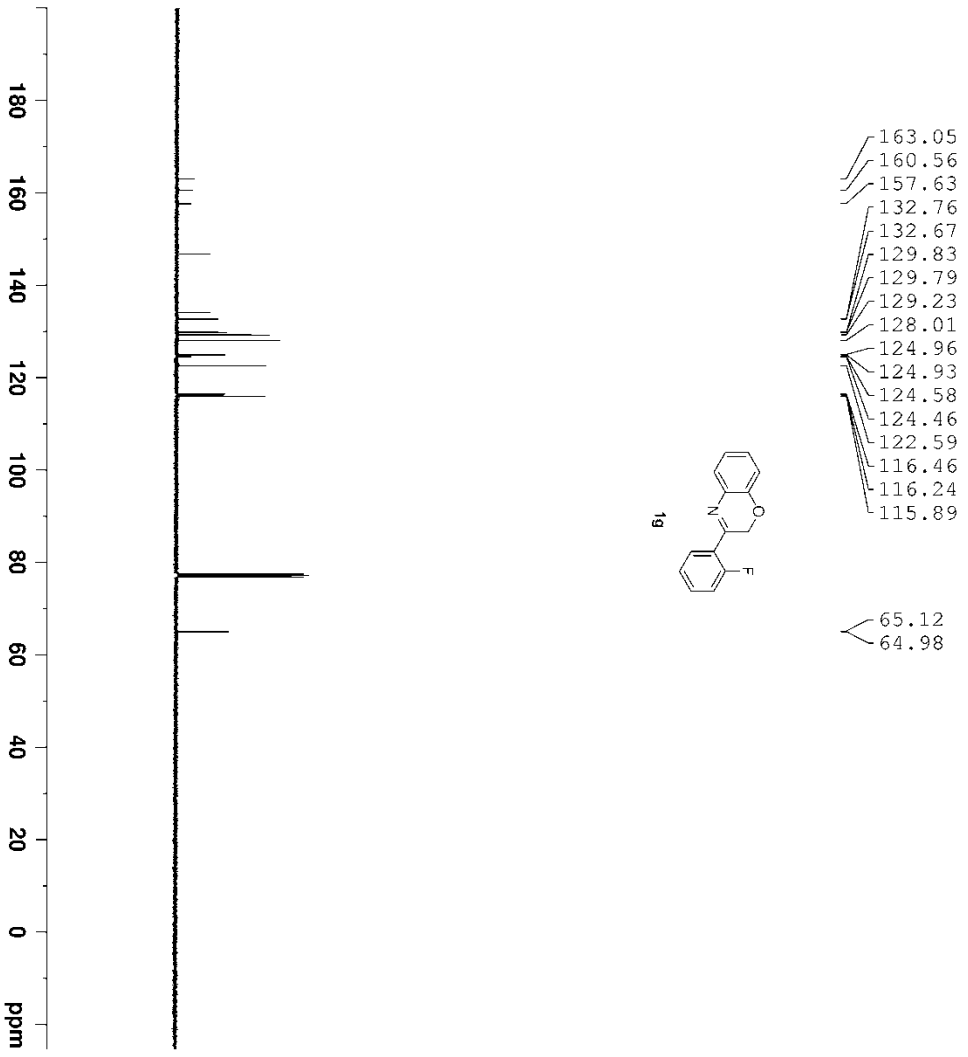

```

NAME: wsm-2-C-S
EXPNO: 1
PROCNO: 1
Date_ : 20151119
Time: 4.39
INSTRUM: spect
PROBHD: 5 mm PABUL 13C
PULPROG: zgpg30
TD: 32768
SOLVENT: CDCl3
NS: 148
DS: 0
SWH: 25232.325 Hz
FIDRES: 0.770646 Hz
AQ: 0.6488364 sec
RG: 128
DW: 19.800 usec
DE: 6.50 usec
TE: 300.0 K
D1: 2.00000000 sec
D11: 0.03000000 sec
ID0: 1
----- CHANNEL f1 -----
SFO1: 100.628298 MHz
NUC1: 13C
P1: 9.40 usec
SI: 32768
SF: 100.6127519 MHz
WDW: FM
SSB: 0
LB: 1.00 Hz
GB: 0
PC: 1.40

```

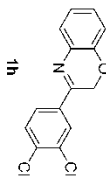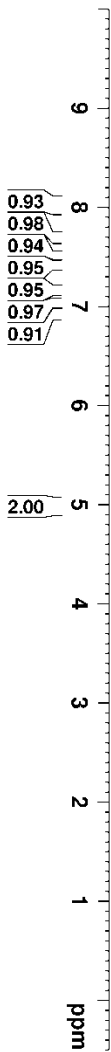

```

NAME wsm-2-H-S
EXPNO 1331
PROCNO 1
Date_ 20151114
Time 12.10
INSTRUM spect
PROBHD 5 mm PABUL-3C
PULPROG zg30
ID 32768
SOLVENT CDCl3
NS 12
DS 0
SWH 12019.230 Hz
FIDRES 0.366798 Hz
AQ 1.3631988 sec
RG 244
DW 41.600 usec
DE 6.50 usec
TE 300.0 K
Dc 2.00000000 sec
IDC 1

===== CHANNEL f1 =====
SF01 400.320007 MHz
NUC1 1H
P1 12.60 usec
S1 65336
SF 400.330000 MHz
WDW EM
SSB 0
LB 0.50 Hz
GB 0
PC 1.00

```

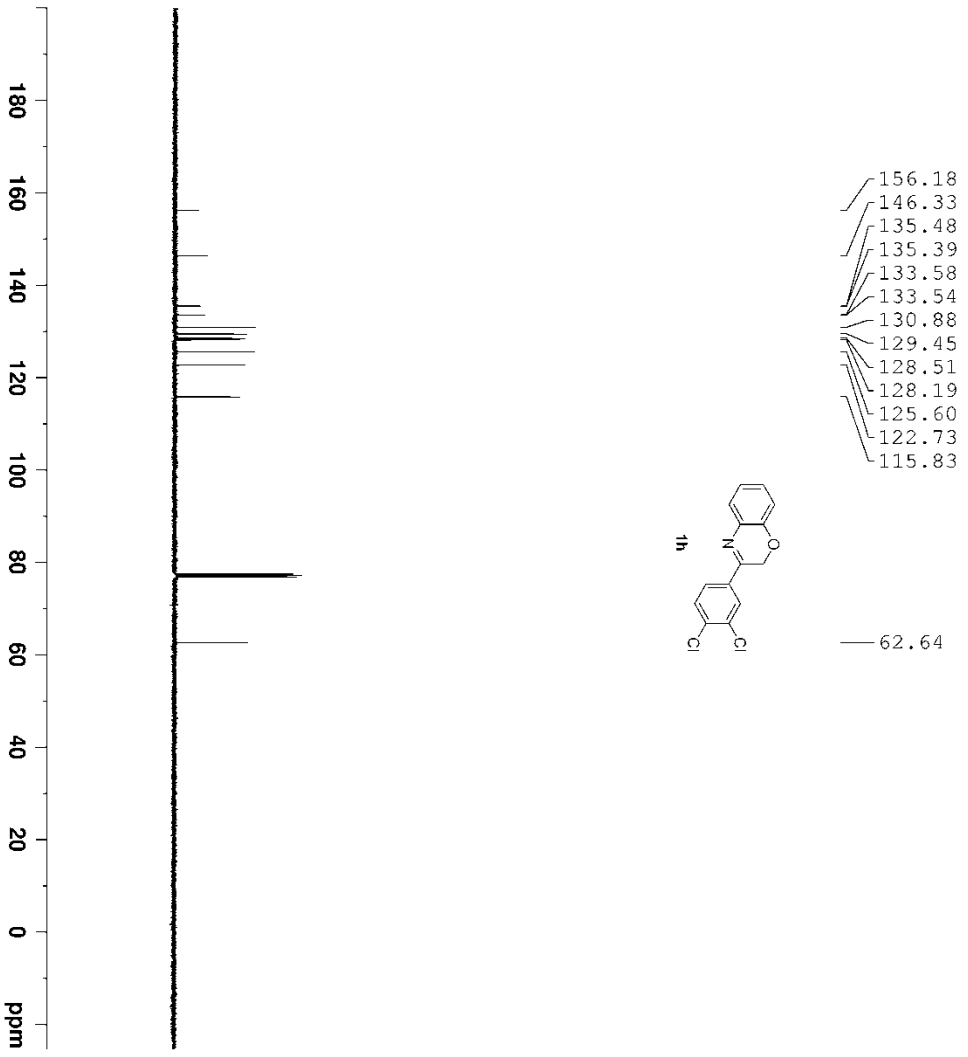

- 156.18
- 146.33
- 135.48
- 135.39
- 133.58
- 133.54
- 130.88
- 129.45
- 128.51
- 128.19
- 125.60
- 122.73
- 115.83

62.64

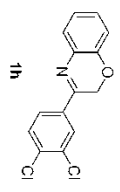

```

NAME          wsm-2-C-S
EXPNO         1331
PROCNO       1
Date_        20151114
Time         12.10
INSTRUM      spect
PROBHD       5 mm PABUL 13C
PULPROG      zgpg30
TD           32768
SOLVENT      CDCl3
NS           60
DS           0
SWH          25232.325 Hz
FIDRES       0.770646 Hz
AQ           0.6488364 sec
RG           128
DW           19.800 usec
DE           6.50 usec
TR           300.0 K
D1           2.00000000 sec
D11          0.03000000 sec
ID0          1

----- CHANNEL f1 -----
SFO1         100.628298 MHz
NUC1         13C
P1           9.40 usec
SI           32768
SF           100.6127517 MHz
WDW          FM
SSB          0
LB           1.00 Hz
GB           0
PC           1.40
  
```

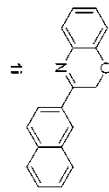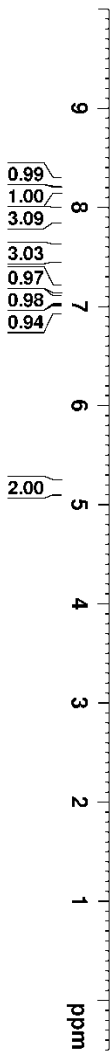

```

NAME wsm-2-H-S
EXPNO 1420
PROCNO 1
Date_ 20151123
Time 16.26
INSTRUM spect
PROBHD 5 mm PABBO BB/
PULPROG zg30
TD 32768
SOLVENT CDCl3
NS 13
DS 0
SWH 8012.820 Hz
FIDRES 0.244532 Hz
AQ 2.0447731 sec
RG 116.67
DW 62.400 usec
DE 6.50 usec
TE 298.0 K
Dc 2.0000000 sec
IDC 1

===== CHANNEL f1 =====
SF01 400.2424716 MHz
NUC1 1H
P1 14.80 usec
S1 65536
SF 400.2400098 MHz
WDW EM
SSB 0
LB 0.30 Hz
GB 0
PC 1.00

```

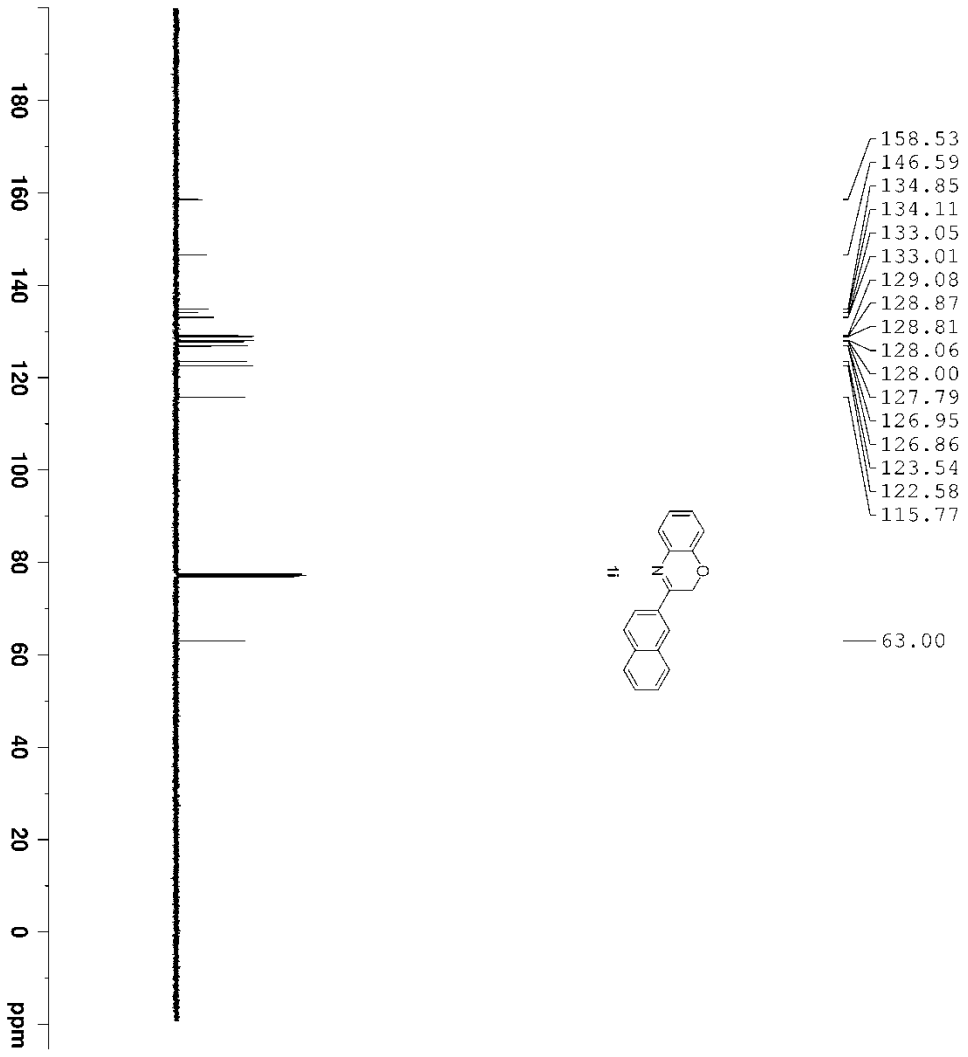

```

NAME: wsm-2-C-S
EXPNO: 1/20
PROCNO: 1
Date_ : 20151123
Time: 16:29
INSTRUM: spect
PROBHD: 5 mm PABBO BB/
PULPROG: zgpg30
TD: 65536
SOLVENT: CDCl3
NS: 29
DS: 4
SWH: 24038.461 Hz
FIDRES: 0.366798 Hz
AQ: 1.3631988 sec
RG: 206.33
DW: 20.800 usec
DE: 6.50 usec
TE: 298.2 K
D1: 2.00000000 sec
D11: 0.03000000 sec
ID0: 1
----- CHANNEL f1 -----
SFO1: 100.6304916 MHz
NUC1: 13C
P1: 10.00 usec
SI: 32768
SF: 100.6404126 MHz
WDW: FM
SSB: 0
LB: 1.00 Hz
GB: 0
PC: 1.40

```

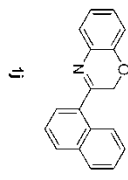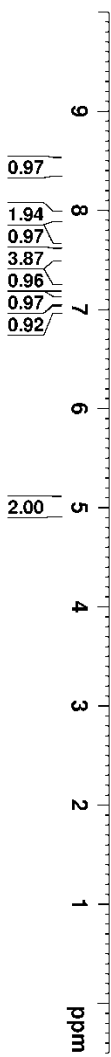

```

NAME wsm-2-H-S
EXPNO 1402
PROCNO 1
Date_ 20151120
Time 9.42
INSTRUM spect
PROBHD 5 mm PABJL
PULPROG zgpg30
ID 32768
SOLVENT CDCl3
NS 13
DS 0
SWH 12019.230 Hz
FIDRES 0.366798 Hz
AQ 1.3631988 sec
RG 203
DW 41.600 usec
DE 6.50 usec
TE 295.0 K
Dc 2.0000000 sec
IDC 1

===== CHANNEL f1 =====
SF01 400.320007 MHz
NUC1 1H
P1 12.60 usec
S- 65336
SF 400.330002 MHz
WDW EM
SSB 0
LB 0.50 Hz
GB 0
PC 1.00
  
```

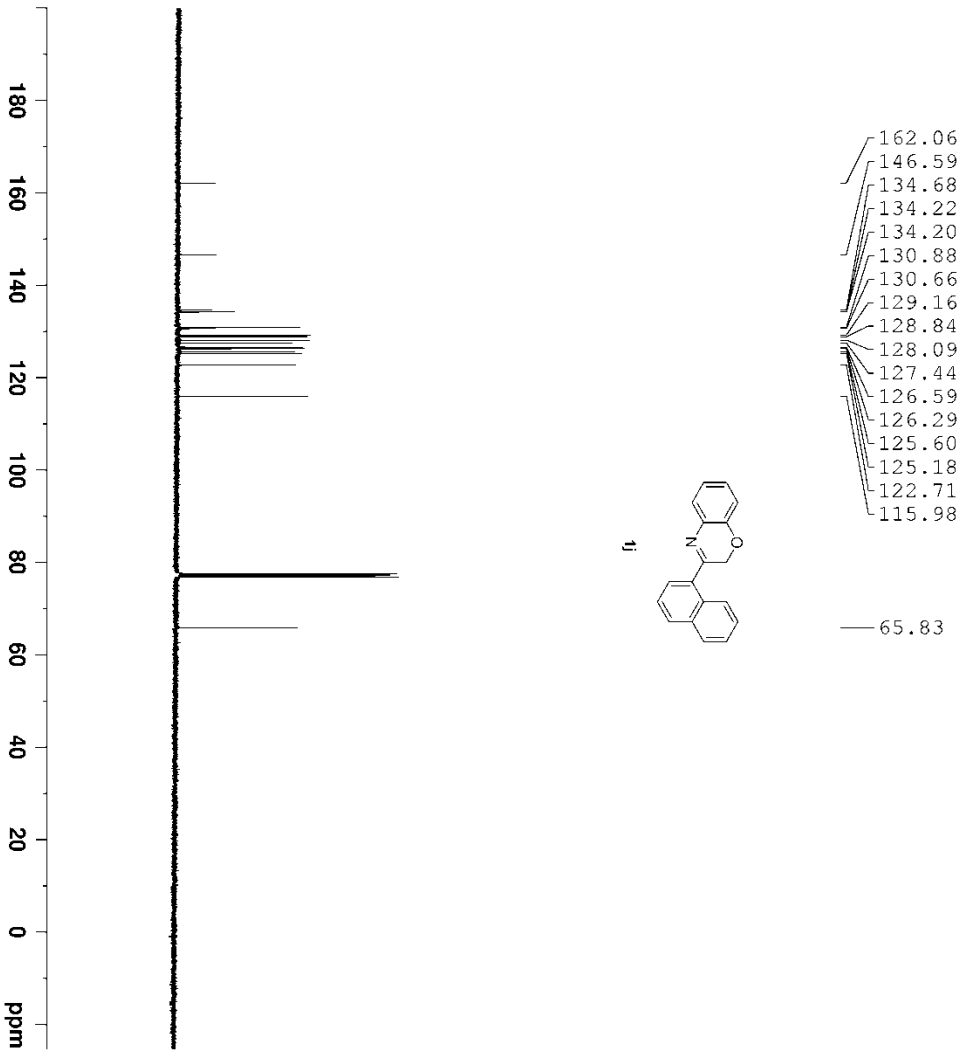

```

NAME          wsm-2-C-S
EXPNO         1602
PROCNO        1
DATE_         20151117
TIME         7.08
INSTRUM       spect
PROBHD        5 mm PABUL 13C
PULPROG       zgpg30
TD            32768
SOLVENT      CDCl3
NS            303
DS            0
SWH           25232.325 Hz
FIDRES        0.770646 Hz
AQ            0.6488364 sec
RG            128
DW            19.800 usec
DE            6.50 usec
TE            300.0 K
D1            2.00000000 sec
D11           0.03000000 sec
ID0           1
  
```

```

----- CHANNEL f1 -----
SFO1         100.628298 MHz
NUC1         13C
P1           9.40 usec
SI           32768
SF           100.6127540 MHz
WDW          FM
SSB          0
LB           1.00 Hz
GB           0
PC           1.40
  
```

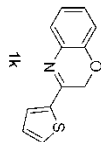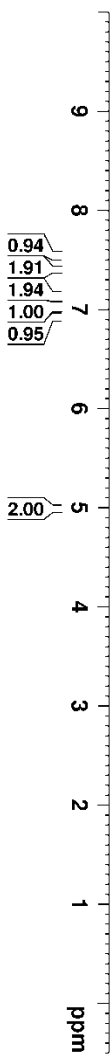

```

NAME wsm-2-H-S
EXPNO 1388
PROCNO 1
Date_ 20151115
Time 7.53
INSTRUM spect
PROBHD 5 mm PABJL
PULPROG zg30
ID 32768
SOLVENT CDCl3
NS 16
DS 0
SWH 12019.230 Hz
FIDRES 0.366798 Hz
AQ 1.3631988 sec
RG 181
DW 41.600 usec
DE 6.50 usec
TE 300.0 K
Dc 2.00000000 sec
IDC 1

===== CHANNEL f1 =====
SF01 400.320007 MHz
NUC1 1H
P1 12.60 usec
S1 65336
SF 400.330002 MHz
WDW EM
SSB 0
LB 0
GB 0
PC 1.00
  
```



153.92  
 146.70  
 141.64  
 134.01  
 130.95  
 128.50  
 128.16  
 128.08  
 127.66  
 122.67  
 115.82

63.08

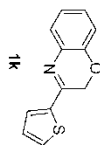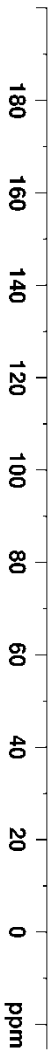

```

NAME: wsm-2-C-S
EXPNO: 1388
PROCNO: 1
Date_ : 20151115
Time: 7.57
INSTRUM: spect
PROBHD: 5 mm PDDUL13C
PULPROG: zgpg30
TD: 32768
SOLVENT: CDCl3
NS: 160
DS: 0
SWH: 25232.325 Hz
FIDRES: 0.770646 Hz
AQ: 0.6488364 sec
RG: 128
DW: 19.800 usec
DE: 6.50 usec
TE: 300.0 K
D1: 2.00000000 sec
D11: 0.03000000 sec
ID0: 1
  
```

```

----- CHANNEL f1 -----
SFO1: 100.628298 MHz
NUC1: 13C
P1: 9.40 usec
SI: 32768
SF: 100.6127502 MHz
WDW: FM
SSB: 0
LB: 1.00 Hz
GB: 0
PC: 1.40
  
```

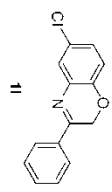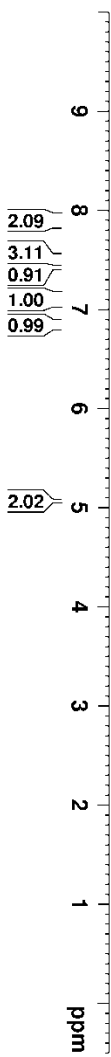

```

NAME wsm-2-H-S
EXPNO 1409
PROCNO 1
Date_ 20151120
Time 9.52
INSTRUM spect
PROBHD 5 mm PABJL
PULPROG zg30
ID 32768
SOLVENT CDCl3
NS 16
DS 0
SWH 12019.230 Hz
FIDRES 0.366798 Hz
AQ 1.3631988 sec
RG 203
DW 41.600 usec
DE 6.50 usec
TE 295.0 K
Dc 2.0000000 sec
IDC 1

===== CHANNEL f1 =====
SF01 400.320007 MHz
NUC1 1H
P1 12.60 usec
S1 65336
SF 400.3300106 MHz
WDW EM
SSB 0
LB 0.50 Hz
GB 0
PC 1.00
  
```

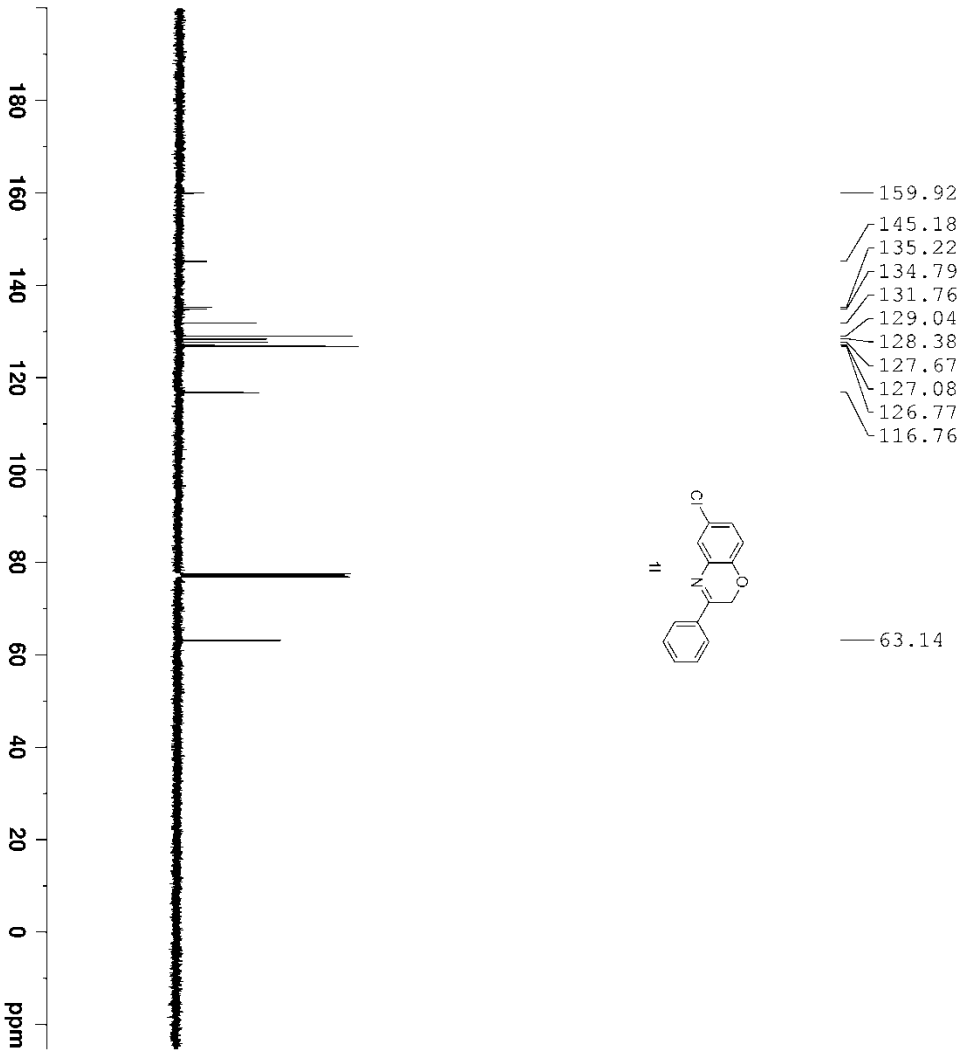

```

NAME          wsm-2-C-S
EXPNO         1609
PROCNO        1
Date_         20151120
Time_         9.54
INSTRUM       spect
PROBHD        5 mm PABUL 13C
PULPROG       zgpg30
TD            32768
SOLVENT       CDCl3
NS            41
DS            0
SWH           25232.325 Hz
FIDRES        0.770646 Hz
AQ            0.6488364 sec
RG            128
DW            19.800 usec
DE            6.50 usec
TE            295.1 K
D1            2.00000000 sec
D11           0.03000000 sec
ID0           1
  
```

```

----- CHANNEL f1 -----
SFO1         100.628298 MHz
NUC1         13C
P1           9.40 usec
SI           32768
SF           100.6127498 MHz
WDW          FM
SSB          0
LB           1.00 Hz
GB           0
PC           1.40
  
```

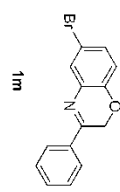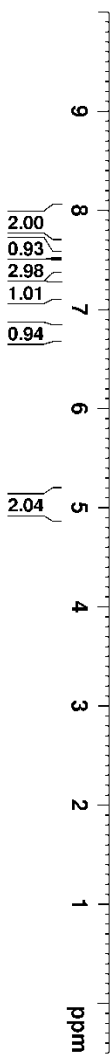

```

NAME wsm-2-H-S
EXPNO 1412
PROCNO 1
Date_ 20151120
Time 10.06
INSTRUM spect
PROBHD 5 mm PABJL
PULPROG zg30
ID 32768
SOLVENT CDCl3
NS 16
DS 0
SWH 12019.230 Hz
FIDRES 0.366798 Hz
AQ 1.3631988 sec
RG 90.5
DW 41.600 usec
DE 6.50 usec
TE 294.8 K
Dc 2.0000000 sec
IDC 1

===== CHANNEL f1 =====
SF01 400.320007 MHz
NUC1 1H
P1 12.60 usec
S1 65336
SF 400.330213 MHz
WDW EM
SSB 0
LB 0.50 Hz
GB 0
PC 1.00
  
```

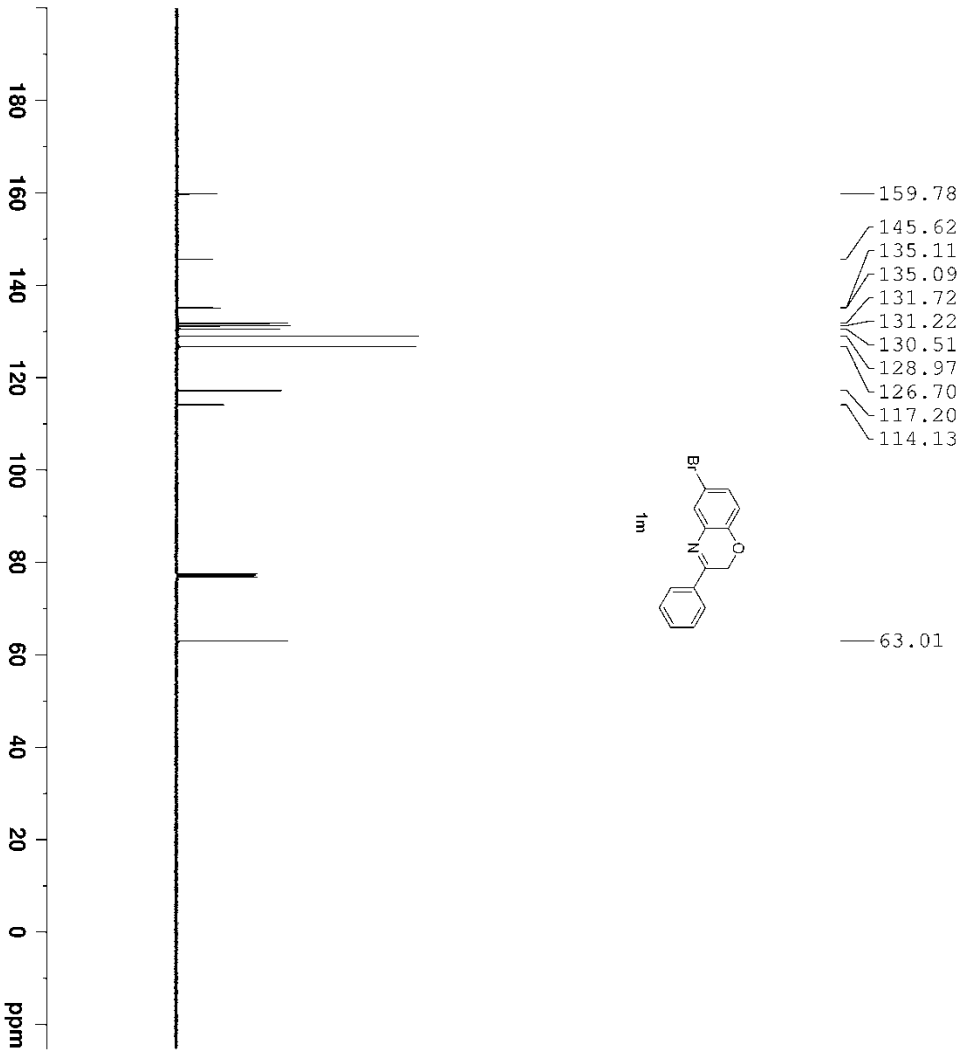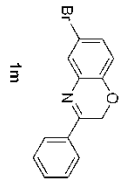

```

NAME          wsm-2-C-S
EXPNO         1412
PROCNO       2
Date_        20151120
Time         10.08
INSTRUM      spect
PROBHD       5 mm PABUL 13C
PULPROG      zgpg30
TD           32768
SOLVENT      CDCl3
NS           99
DS           0
SWH          25232.325 Hz
FIDRES       0.770646 Hz
AQ           0.6488364 sec
RG           128
DW           19.800 usec
DE           6.50 usec
TE           295.1 K
D1           2.00000000 sec
D11          0.03000000 sec
ID0          1

----- CHANNEL f1 -----
SFO1         100.628298 MHz
NUC1         13C
P1           9.40 usec
SI           32768
SF           100.6127571 MHz
WDW          FM
SSB          0
LB           1.00 Hz
GB           0
PC           1.40

```

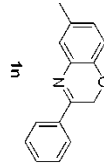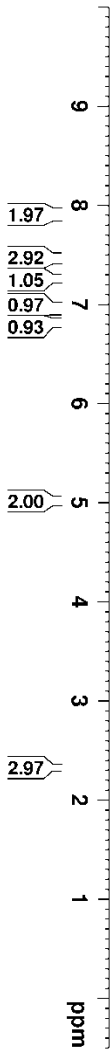

```

NAME wsm-2-H-S
EXPNO 1411
PROCNO 1
Date_ 20151120
Time 9.58
INSTRUM spect
PROBHD 5 mm PABJL
PULPROG zg30
ID 32768
SOLVENT CDCl3
NS 16
DS 0
SWH 12019.230 Hz
FIDRES 0.366798 Hz
AQ 1.3631988 sec
RG 128
DW 41.600 usec
DE 6.50 usec
TE 294.9 K
Dc 2.0000000 sec
IDC 1

===== CHANNEL f1 =====
SF01 400.320007 MHz
NUC1 1H
P1 12.60 usec
S1 65336
SF 400.330069 MHz
WDW EM
SSB 0
LB 0.50 Hz
GB 0
PC 1.00
  
```

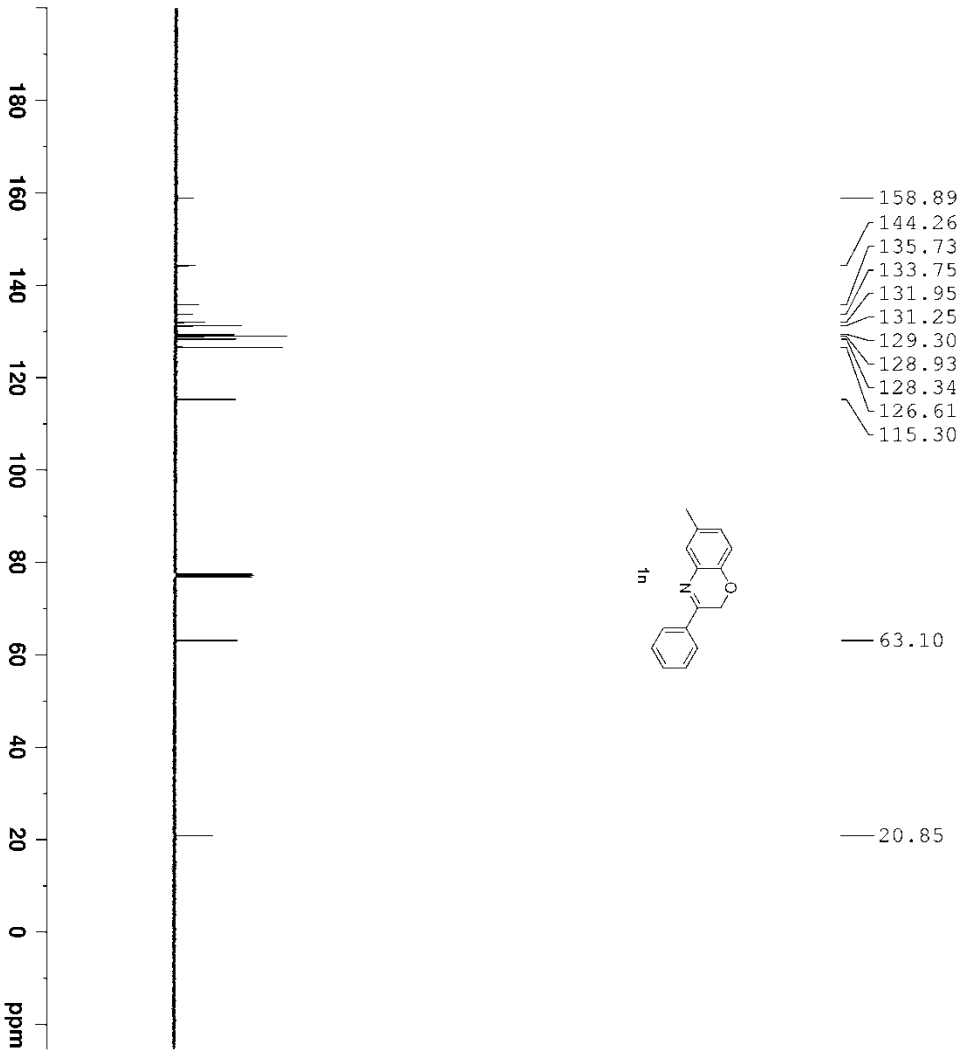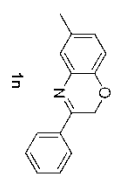

```

NAME: wsm-2-C-S
EXPNO: 1411
PROCNO: 1
Date_ : 20151120
Time: 10.01
INSTRUM: spect
PROBHD: 5 mm PABUL 13C
PULPROG: zgpg30
TD: 32768
SOLVENT: CDCl3
NS: 100
DS: 0
SWH: 25232.325 Hz
FIDRES: 0.770646 Hz
AQ: 0.6488364 sec
RG: 128
DW: 19.800 usec
DE: 6.50 usec
TE: 295.3 K
D1: 2.00000000 sec
D11: 0.03000000 sec
ID0: 1
----- CHANNEL f1 -----
SFO1: 100.628298 MHz
NUC1: 13C
P1: 9.40 usec
SI: 32768
SF: 100.6127533 MHz
WDW: FM
SSB: 0
LB: 1.00 Hz
GB: 0
PC: 1.40

```

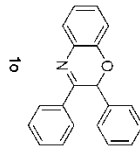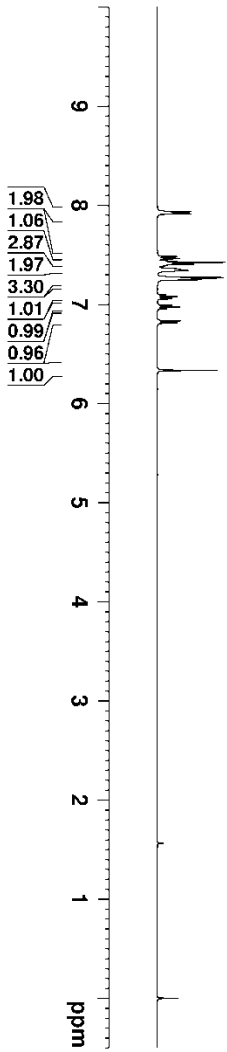

```

NAME wsm-2-H-S
EXPNO 1310
PROCNO 1
Date_ 20160103
Time 7.05
INSTRUM spect
PROBHD 5 mm PABJL
PULPROG zg30
TD 32768
SOLVENT CDCl3
NS 13
DS 0
SWH 12019.230 Hz
FIDRES 0.366798 Hz
AQ 1.3631988 sec
RG 203
DW 41.600 usec
DE 6.50 usec
TE 300.0 K
Dc 2.00000000 sec
IDC 1

===== CHANNEL f1 =====
SFO1 400.320007 MHz
NUC1 1H
P1 12.60 usec
S- 65336
SF 400.330042 MHz
WDW EM
SSB 0
LB 0
GB 0
PC 1.00
  
```



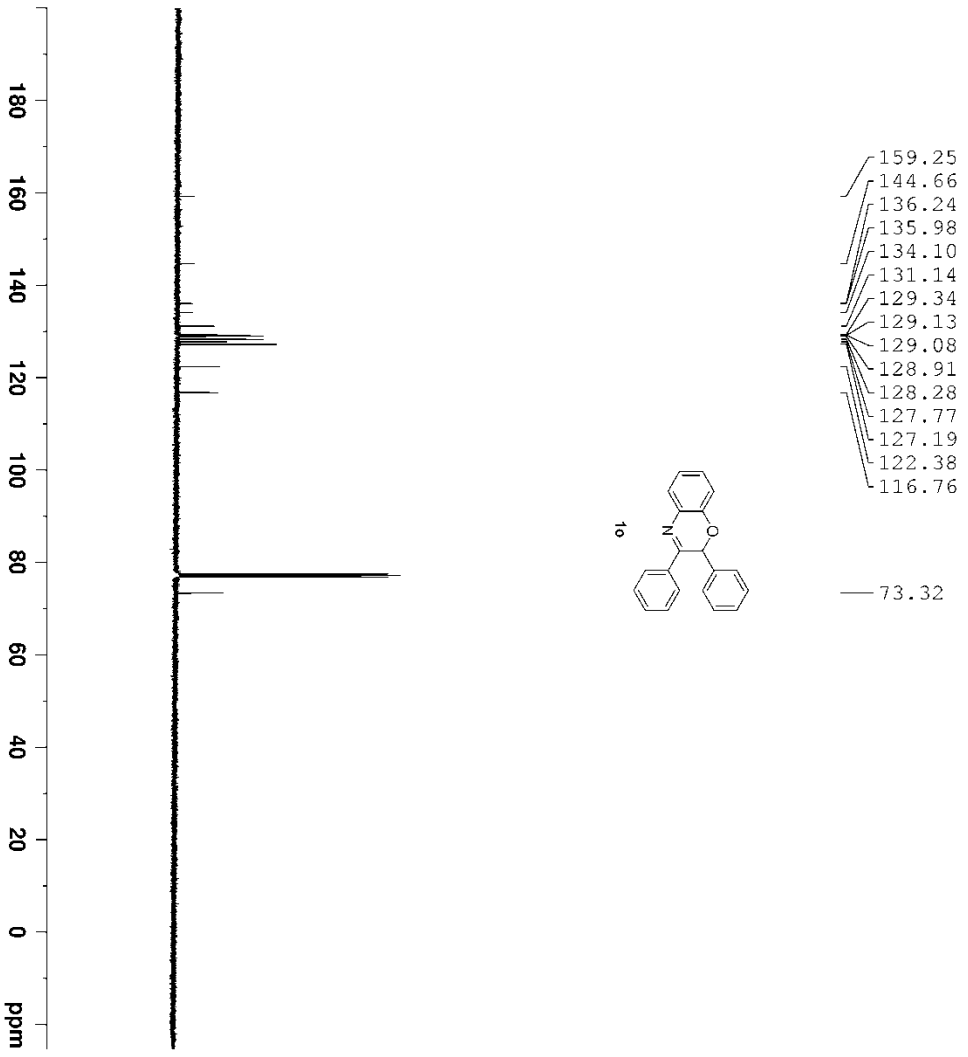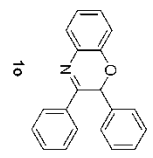

- 159.25
- 144.66
- 136.24
- 135.98
- 134.10
- 131.14
- 129.34
- 129.13
- 129.08
- 128.91
- 128.28
- 127.77
- 127.19
- 122.38
- 116.76
- 73.32

```

NAME: wsm-2-C-S
EXPNO: 1316
PROCNO: 1
Date_ : 20160105
Time: 7.07
INSTRUM: spect
PROBHD: 5 mm PABUL 13C
PULPROG: zgpg30
TD: 32768
SOLVENT: CDCl3
NS: 239
DS: 0
SWH: 25232.325 Hz
FIDRES: 0.770646 Hz
AQ: 0.6488364 sec
RG: 161
DW: 19.800 usec
DE: 6.50 usec
TE: 300.0 K
D1: 2.0000000 sec
D11: 0.0300000 sec
ID0: 1
----- CHANNEL f1 -----
SFO1: 100.628298 MHz
NUC1: 13C
P1: 9.40 usec
SI: 32768
SF: 100.6127495 MHz
WDW: FM
SSB: 0
LB: 1.00 Hz
GB: 0
PC: 1.40

```

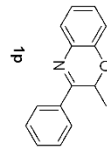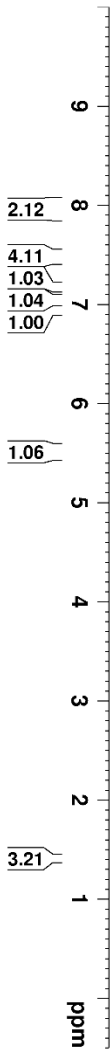

```

NAME wsm-2-H-S
EXPNO 1482
PROCNO 1
Date_ 20160107
Time 11.14
INSTRUM spect
PROBHD 5 mm PABUL 13C
PULPROG zg30
TD 32768
SOLVENT CDCl3
NS 16
DS 0
SWH 12019.230 Hz
FIDRES 0.366798 Hz
AQ 1.3631988 sec
RG 128
DW 41.600 usec
DE 6.50 usec
TE 300.0 K
D1 2.00000000 sec
ID0 1

===== CHANNEL f1 =====
SF01 400.132007 MHz
NUC1 1H
P1 12.60 usec
SI 65536
SF 400.1300100 MHz
WDW EM
SSB 0
LB 0.50 Hz
GB 0
PC 1.00
  
```

180 160 140 120 100 80 60 40 20 0 ppm

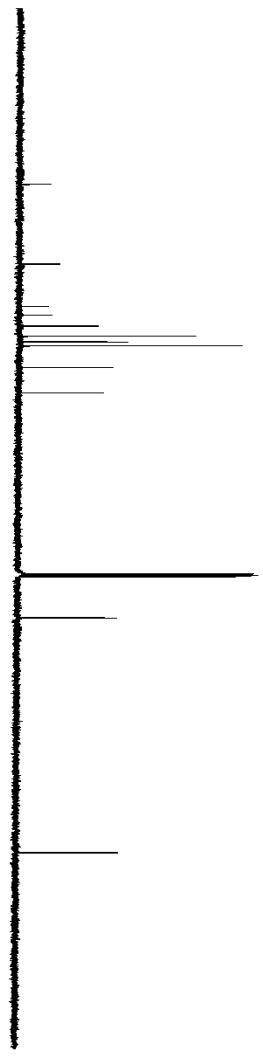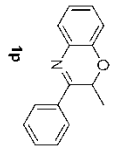

- 161.84
- 144.59
- 135.40
- 133.53
- 131.18
- 128.99
- 128.94
- 127.71
- 122.25
- 116.73
- 67.99
- 17.14

```

NAME: wsm-2-C-S
EXPNO: 1
PROCNO: 1
Date_ : 20160107
Time: 11.16
INSTRUM: spect
PROBHD: 5 mm PABUL 13C
PULPROG: zgpg30
TD: 32768
SOLVENT: CDCl3
NS: 100
DS: 0
SWH: 25232.325 Hz
FIDRES: 0.770646 Hz
AQ: 0.6488364 sec
RG: 161
DW: 19.800 usec
DE: 6.50 usec
TE: 300.0 K
D1: 2.00000000 sec
D11: 0.03000000 sec
ID0: 1
----- CHANNEL f1 -----
SFO1: 100.628298 MHz
NUC1: 13C
P1: 9.40 usec
SI: 32768
SF: 100.6127510 MHz
WDW: FM
SSB: 0
LB: 1.00 Hz
GB: 0
PC: 1.40

```

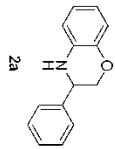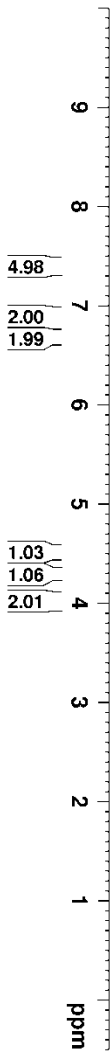

```

NAME          wsm-2-H-P
EXPNO         1480
PROCNO        1
Date_         20151225
Time         7.48
INSTRUM       spect
PROBHD        5 mm PABIL-3C
PULPROG       zg30
TD            32768
SOLVENT       CDCl3
NS            16
DS            0
SWH           12019.230 Hz
F2-DRES       0.366798 Hz
AQ            1.3631988 sec
RG            203
DE            41.600 usec
TE            300.0 K
D0            2.00000000 sec
ID0           1

===== CHANNEL f1 =====
SFO1          400.1320007 MHz
NUC1          1H
P1            12.60 usec
S1            65536
SF            400.1300129 MHz
WDW           EM
SSB           0
GB            0
PC            1.00
  
```

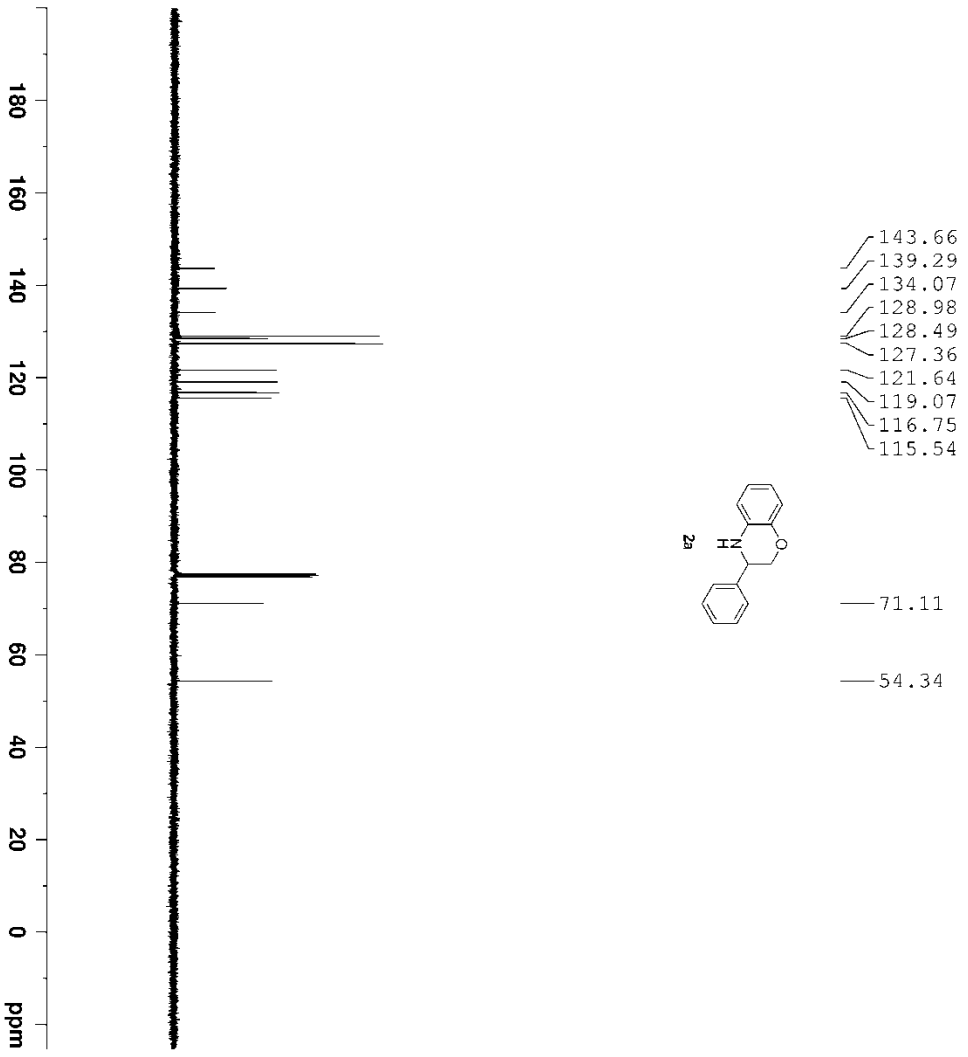

```

NAME: wsm-2-C-P
EXPNO: 1
PROCNO: 1
Date_ : 20151209
Time: 7.22
INSTRUM: spect
PROBHD: 5 mm PABUL 13C
PULPROG: zgpg30
TD: 32768
SOLVENT: CDCl3
NS: 13
DS: 0
SWH: 25232.325 Hz
FIDRES: 0.770646 Hz
AQ: 0.6488364 sec
RG: 128
DW: 19.800 usec
DE: 6.50 usec
TE: 300.0 K
D1: 2.00000000 sec
D11: 0.03000000 sec
ID0: 1
----- CHANNEL f1 -----
SFO: 100.628298 MHz
NUC1: 13C
P1: 9.40 usec
SI: 32768
SF: 100.6127594 MHz
WDW: FM
SSB: 0
LB: 1.00 Hz
GB: 0
PC: 1.40

```

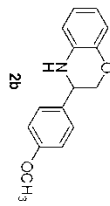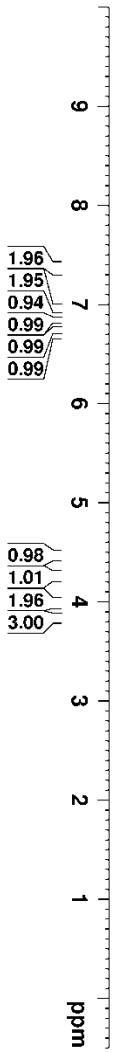

```

NAME          wsm-2-H-P
EXPNO         1450
PROCNO        1
Date_         20151127
Time_         14.40
INSTRUM       spect
PROBHD        5 mm PA3BO BB/
PULPROG       zg30
TD            32768
SOLVENT       CDCl3
NS            13
DS            0
SWH           8012.820 Hz
FIDRES        0.244532 Hz
AQ            2.0447731 sec
RG            125.02
RQ            62.400 usec
DE            6.50 usec
TE            298.0 K
Dc            2.0000000 sec
IDC           1

===== CHANNEL f1 =====
SFO1          400.2424716 MHz
NUC1          1H
P1            14.80 usec
S1            65536
SF            400.2400932 MHz
WDW           EM
SSB           0
LB            0.30 Hz
GB            0
PC            1.00
  
```

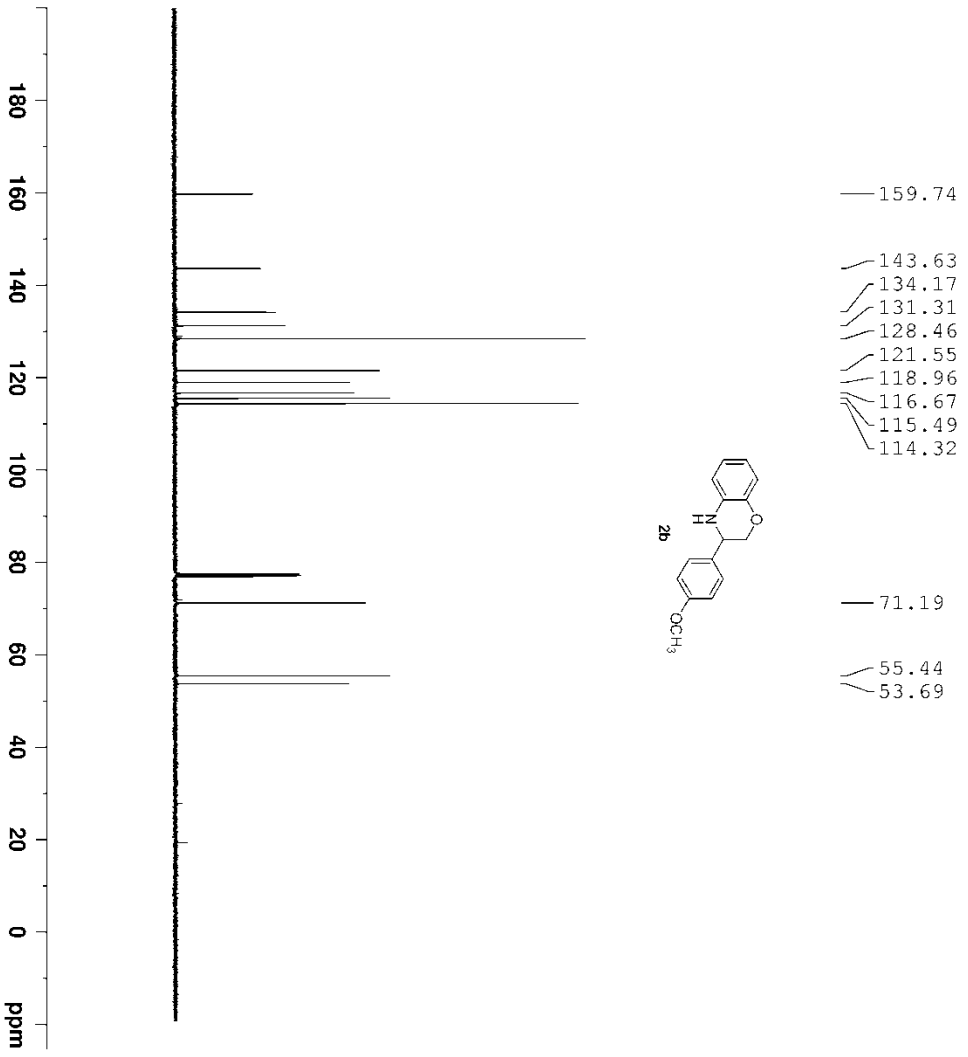

```

NAME          wsm-2-C-P
EXPNO         150
PROCNO        1
Date_         20151127
Time_         10.28
INSTRUM       spect
PROBHD        5 mm PABBO-BB/
PULPROG       zgpg30
TD            65536
SOLVENT       CDCl3
NS            59
DS            4
SWH           24038.461 Hz
FIDRES        0.366798 Hz
AQ            1.3631988 sec
RG            206.32
RG            206.32
DW            20.800 usec
DE            6.50 usec
TE            298.5 K
D1            2.0000000 sec
D11           0.0300000 sec
ID0           1
----- CHANNEL f1 -----
SFO1         100.6304916 MHz
NUC1         13C
P1           10.00 usec
SI           32768
SF           100.6404215 MHz
WDW          FM
SSB          0
LB           1.00 Hz
GB           0
PC           1.40
  
```

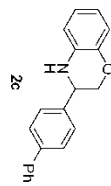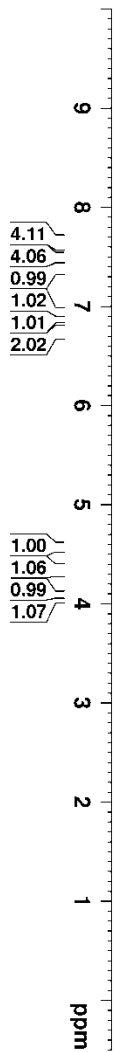

```

NAME          wsm-2-H-P
EXPNO         1455
PROCNO        1
Date_         20151127
Time         14.53
INSTRUM       spect
PROBHD        5 mm PABBO BB/
PULPROG       zg30
TD            32768
SOLVENT       CDCl3
NS            16
DS            0
SWH           8012.820 Hz
FIDRES        0.244532 Hz
AQ            2.0447731 sec
RG            140.59
RG            140.59
DW            62.400 usec
DE            6.50 usec
TE            298.0 K
Dc            2.0000000 sec
IDC           1

===== CHANNEL f1 =====
SF01          400.2424716 MHz
NUC1          1H
P1            14.80 usec
S1            65536
SF            400.2400093 MHz
WDW           EM
SSB           0
LB            0.30 Hz
GB            0
PC            1.00
  
```



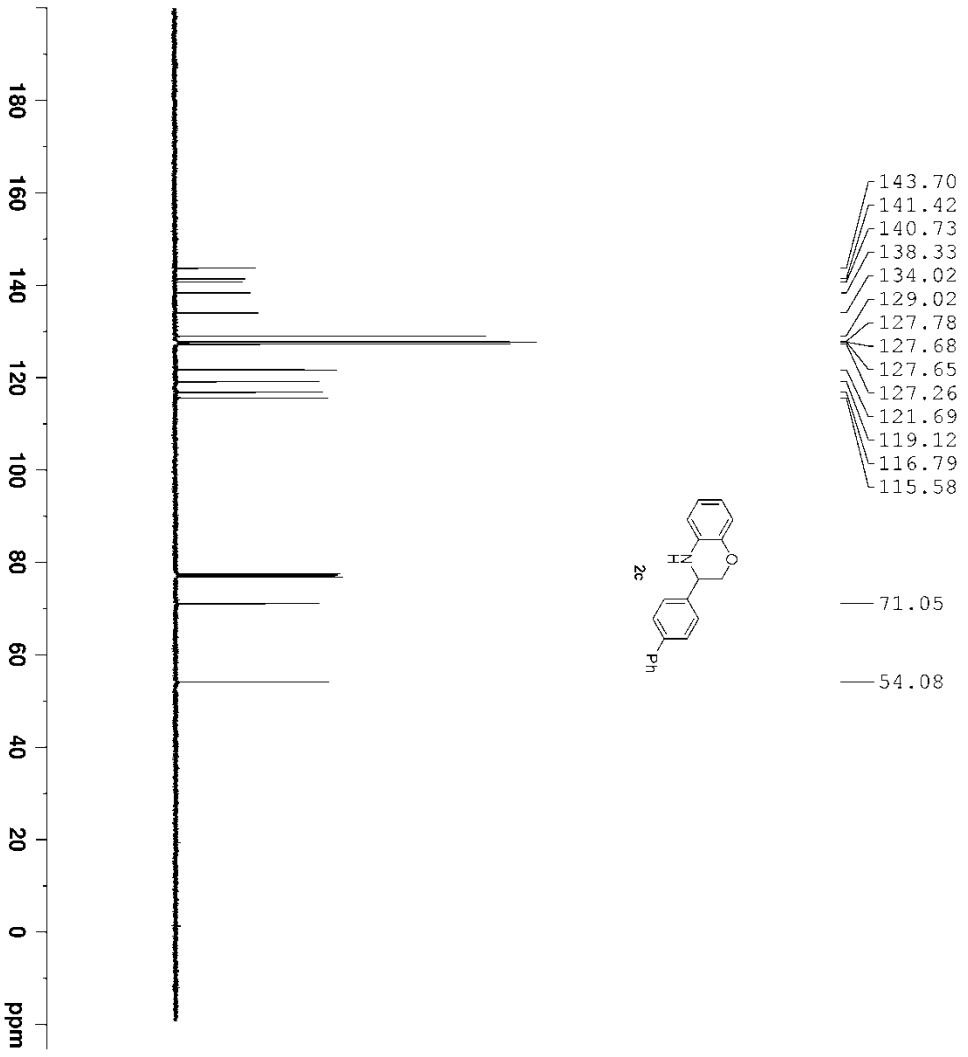

- 143.70
- 141.42
- 140.73
- 138.33
- 134.02
- 129.02
- 127.78
- 127.68
- 127.65
- 127.26
- 121.69
- 119.12
- 116.79
- 115.58
- 71.05
- 54.08

```

NAME          wsm-2-C-P
EXPNO         1455
PROCNO        1
Date_         20151127
Time         10.50
INSTRUM       spect
PROBHD        5 mm PABBO BB/
PULPROG       zgpg30
TD            65536
SOLVENT       CDCl3
NS            21
DS            4
SWH           24038.461 Hz
FIDRES        0.366798 Hz
AQ            1.3631988 sec
RG            206.33
DW            20.800 usec
DE            6.50 usec
TE            298.5 K
D1            2.0000000 sec
D11           0.0300000 sec
ID0           1
  
```

```

----- CHANNEL f1 -----
SFO1         100.6304916 MHz
NUC1         13C
P1           10.00 usec
SI           32768
SF           100.6404201 MHz
WDW          FM
SSB          0
LB           1.00 Hz
GB           0
PC           1.40
  
```

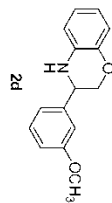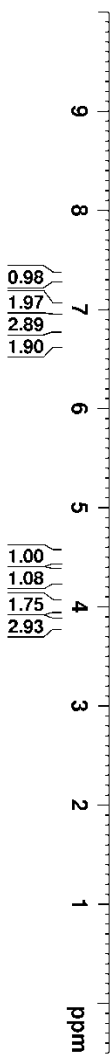

```

NAME wsm-2-H-P
EXPNO 1449
PROCNO 2
Date_ 20151127
Time 14.35
INSTRUM spect
PROBHD 5 mm PA3BBO BB/
PULPROG zg30
TD 32768
SOLVENT CDCl3
NS 16
DS 0
SWH 8012.820 Hz
FIDRES 0.244532 Hz
AQ 2.0447731 sec
RG 116.67
RW 62.400 usec
DE 6.50 usec
TE 298.0 K
Dc 2.0000000 sec
IDC 1

===== CHANNEL f1 =====
SF01 400.2424716 MHz
NUC1 1H
P1 14.80 usec
S1 65536
SF 400.2400932 MHz
WDW EM
SSB 0
LB 0.30 Hz
GB 0
PC 1.00

```

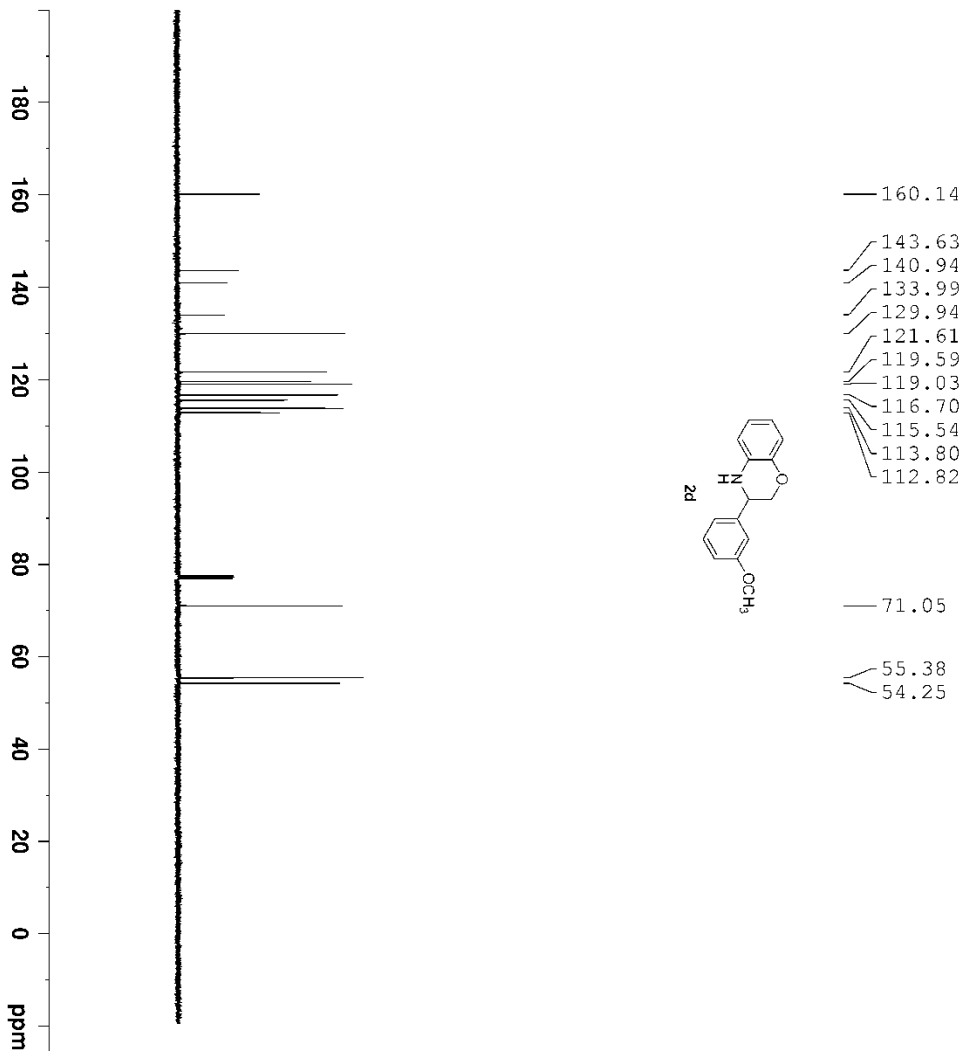

```

NAME: wsm-2-C-P
EXPNO: 1
PROCNO: 1
DATE_: 20151127
Time: 10.20
INSTRUM: spect
PROBHD: 5 mm PABBO BB/
PULPROG: zgpg30
TD: 65536
SOLVENT: CDCl3
NS: 28
DS: 4
SWH: 24038.461 Hz
FIDRES: 0.366798 Hz
AQ: 1.3631988 sec
RG: 206.33
DW: 20.800 usec
DE: 6.50 usec
TE: 298.1 K
D1: 2.00000000 sec
D11: 0.03000000 sec
ID0: 1
----- CHANNEL f1 -----
SFO1: 100.6304916 MHz
NUC1: 13C
P1: 10.00 usec
SI: 32768
SF: 100.6404228 MHz
WDW: FM
SSB: 0
LB: 1.00 Hz
GB: 0
PC: 1.40

```

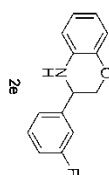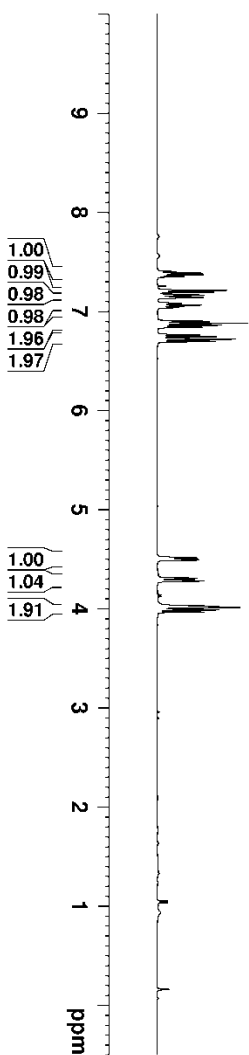

```

NAME          wsm-2-H-P
EXPNO         1452
PROCNO        1
Date_         20151127
Time         14.43
INSTRUM       spect
PROBHD        5 mm PABBO BB/
PULPROG       zg30
TD            32768
SOLVENT       CDCl3
NS            16
DS            0
SWH           8012.820 Hz
FIDRES        0.244532 Hz
AQ            2.0447731 sec
RG            206.33
DW            62.400 usec
DE            6.50 usec
TE            298.0 K
Dc            2.0000000 sec
IDC           1

===== CHANNEL f1 =====
SF01          400.2424716 MHz
NUC1          1H
P1            14.80 usec
S1            65536
SF            400.2400093 MHz
WDW           EM
SSB           0
LB            0.30 Hz
GB            0
PC            1.00
  
```

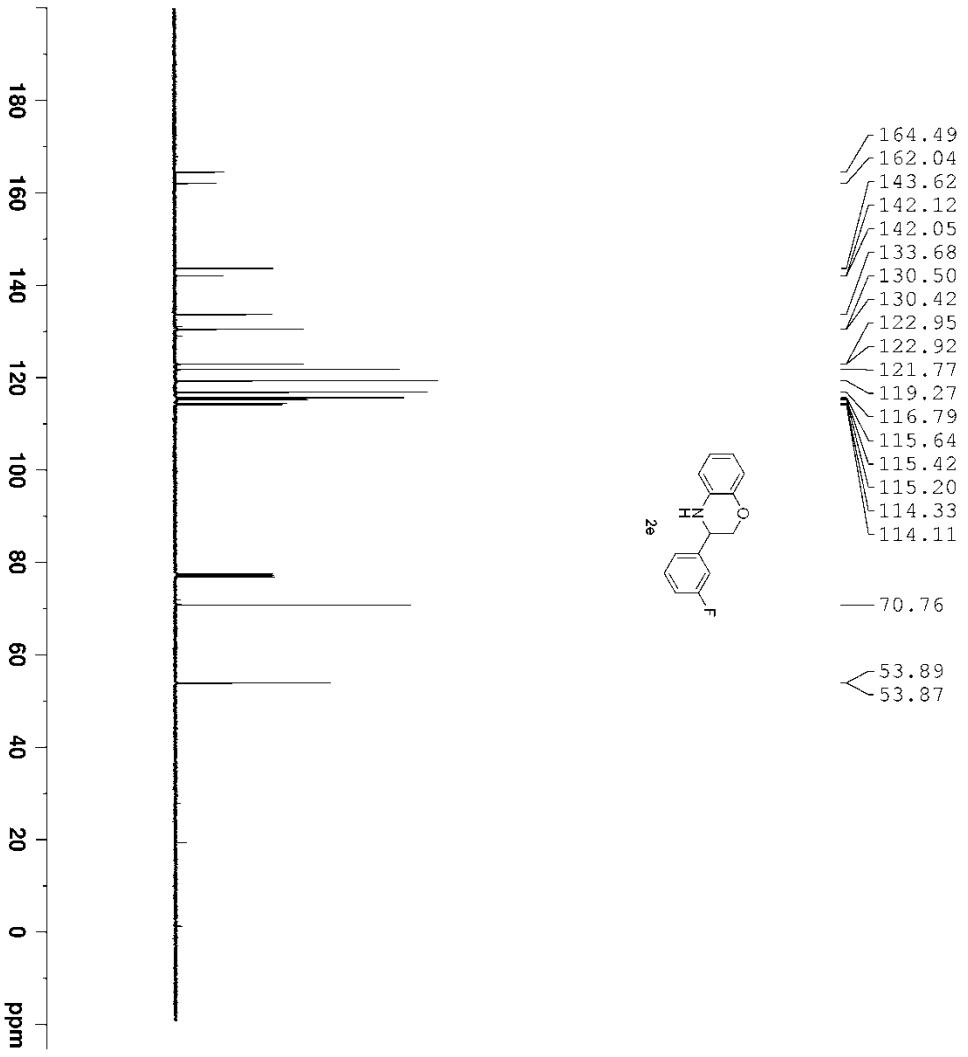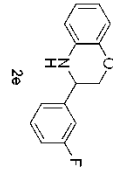

```

NAME: wsm-2-C-P
EXPNO: 1
PROCNO: 1
Date_ : 20151127
Time: 10.34
INSTRUM: spect
PROBHD: 5 mm PABBO BB/
PULPROG: zgpg30
TD: 65536
SOLVENT: CDCl3
NS: 108
DS: 4
SWH: 24038.461 Hz
FIDRES: 0.366798 Hz
AQ: 1.3631988 sec
RG: 206.33
DW: 20.800 usec
DE: 6.50 usec
TE: 298.3 K
D1: 2.00000000 sec
D11: 0.03000000 sec
ID0: 1
----- CHANNEL f1 -----
SFO1: 100.6304916 MHz
NUC1: 13C
P1: 10.00 usec
SI: 32768
SF: 100.6404207 MHz
WDW: FM
SSB: 0
LB: 1.00 Hz
GB: 0
PC: 1.40

```

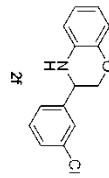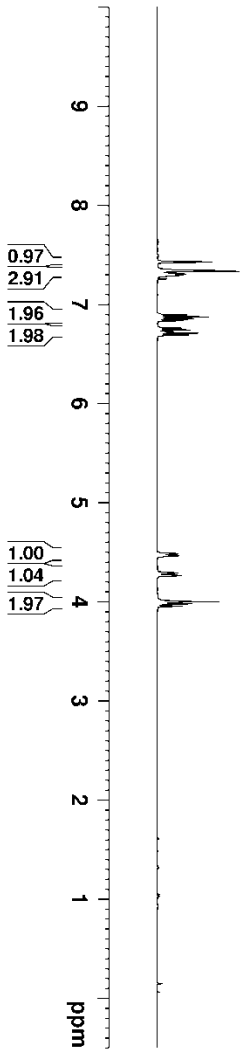

```

NAME wsm-2-H-P
EXPNO 1457
PROCNO 1
Date_ 20151-27
Time 14.59
INSTRUM spect
PROBHD 5 mm PABBO BB/
PULPROG zg30
TD 32768
SOLVENT CDCl3
NS 16
DS 0
SWH 8012.820 Hz
FIDRES 0.244532 Hz
AQ 2.0447731 sec
RG 125.02
RG 62.400 usec
DE 6.50 usec
TE 298.0 K
Dc 2.0000000 sec
IDC 1

===== CHANNEL f1 =====
SF01 400.2424716 MHz
NUC1 1H
P1 14.80 usec
S1 65536
SF 400.2400094 MHz
WDW EM
SSB 0
LB 0.30 Hz
GB 0
PC 1.00

```

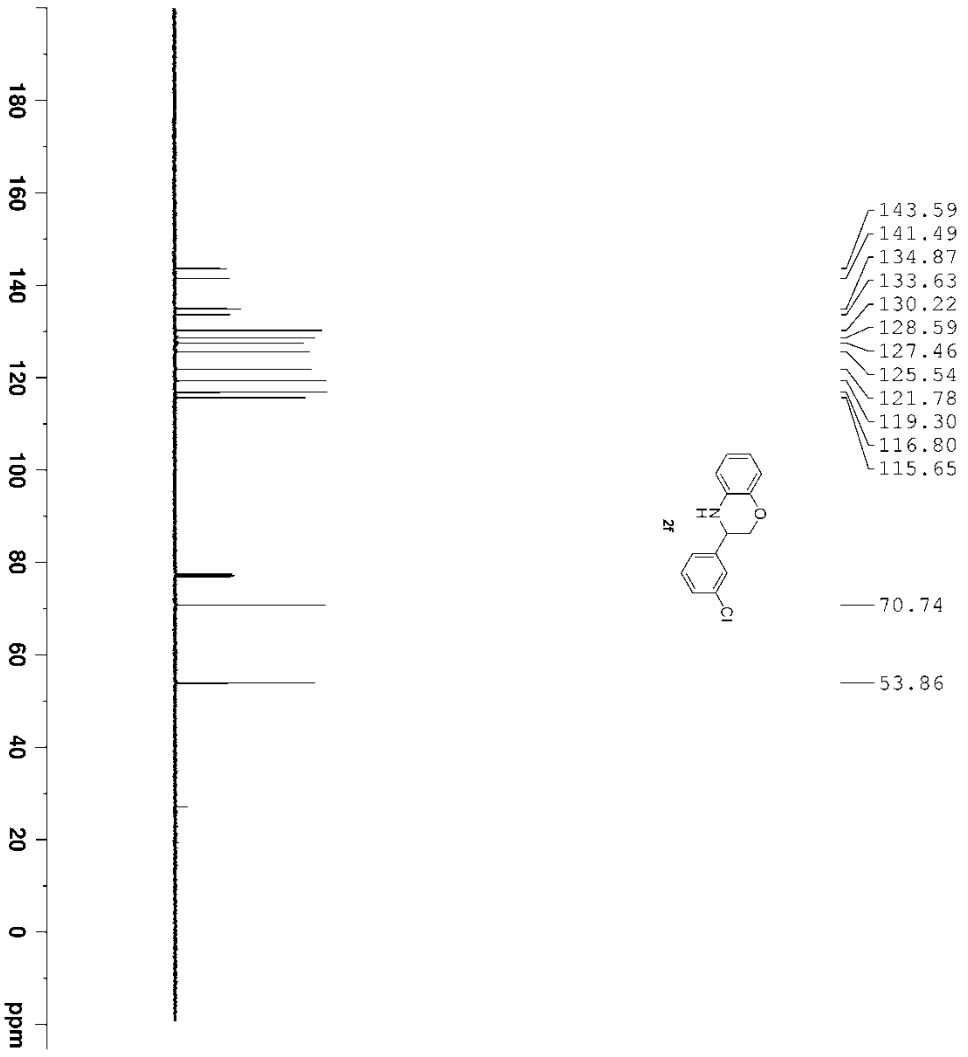

```

NAME: wsm-2-C-P
EXPNO: 1
PROCNO: 1
Date_ : 20151127
Time: 10.55
INSTRUM: spect
PROBHD: 5 mm PABBO BB/
PULPROG: zgpg30
TD: 65536
SOLVENT: CDCl3
NS: 30
DS: 4
SWH: 24038.461 Hz
FIDRES: 0.366798 Hz
AQ: 1.3631988 sec
RG: 206.33
DW: 20.800 usec
DE: 6.50 usec
TE: 298.6 K
D1: 2.0000000 sec
D11: 0.0300000 sec
ID0: 1
----- CHANNEL f1 -----
SFO1: 100.6304916 MHz
NUC1: 13C
P1: 10.00 usec
SI: 32768
SF: 100.6404209 MHz
WDW: FM
SSB: 0
LB: 1.00 Hz
GB: 0
PC: 1.40

```

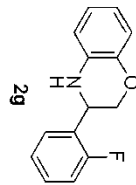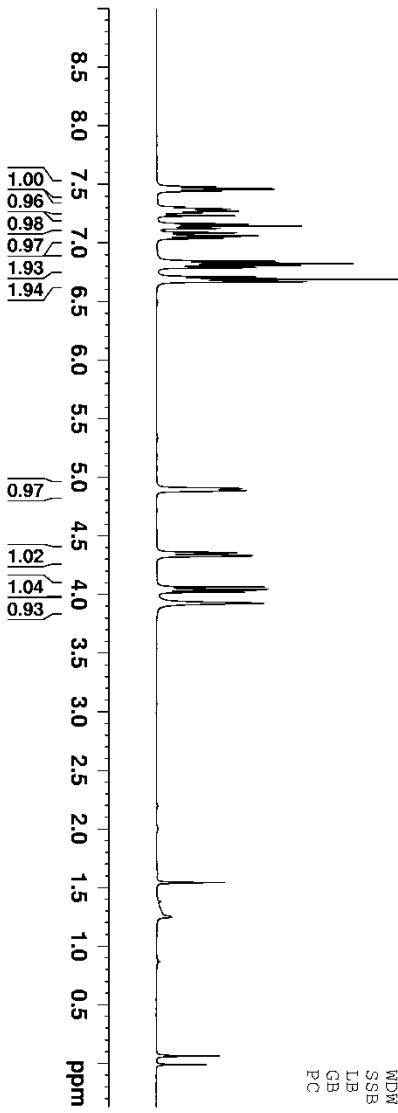

```

NAME          wsm-2-H-P
EXPNO         1465
PROCNO        2
Date_         20151210
Time          13.52
INSTRUM       spect
PROBHD        5 mm PADUL 13C
PULPROG       zg30
TD            32768
SOLVENT       CDCl3
NS            12
DS            0
SWH           12019.230 Hz
FIDRES       0.366798 Hz
AQ           1.3631988 sec
RG            203
DW           41.600 usec
DE           6.50 usec
TE           300.0 K
D1           2.00000000 sec
ID0           1

===== CHANNEL f1 =====
SFO1         400.1320007 MHz
NUC1         1H
P1           12.60 usec
SI           65536
SF           400.1300207 MHz
WDW          EM
SSB          0
LB           0.50 Hz
GB           0
PC           1.00

```



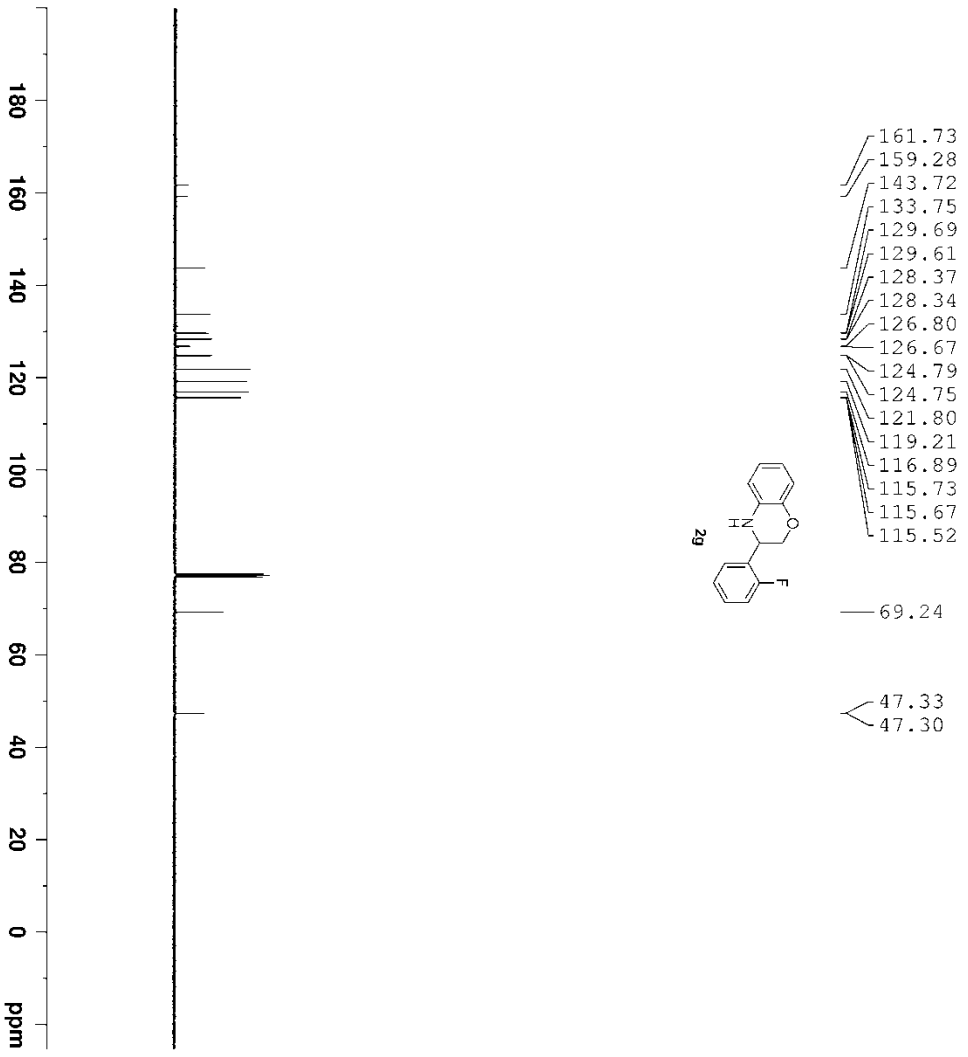

```

NAME: wsm-2-C-P
EXPNO: 1
PROCNO: 1
Date_ : 20151209
Time: 7.36
INSTRUM: spect
PROBHD: 5 mm PABUL 13C
PULPROG: zgpg30
TD: 32768
SOLVENT: CDCl3
NS: 82
DS: 0
SWH: 25232.325 Hz
FIDRES: 0.770646 Hz
AQ: 0.6488364 sec
RG: 114
DW: 19.800 usec
DE: 6.50 usec
TE: 300.0 K
D1: 2.00000000 sec
D11: 0.03000000 sec
ID0: 1
----- CHANNEL f1 -----
SFO1: 100.628298 MHz
NUC1: 13C
P1: 9.40 usec
SI: 32768
SF: 100.6127564 MHz
WDW: FM
SSB: 0
LB: 1.00 Hz
GB: 0
PC: 1.40

```

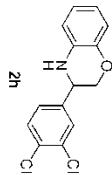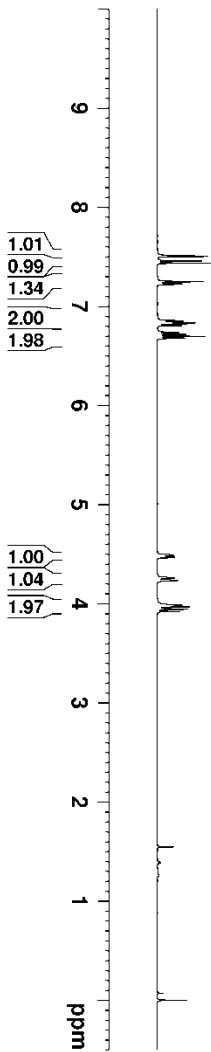

```

NAME wsm-2-H-P
EXPNO 1464
PROCNO 1
Date_ 20151215
Time 7.37
INSTRUM spect
PROBHD 5 mm PABJL
PULPROG zg30
TD 32768
SOLVENT CDCl3
NS 16
DS 0
SWH 12019.230 Hz
F2-DRES 0.366798 Hz
AQ 1.3631988 sec
RG 203
DW 41.600 usec
DE 6.50 usec
TE 300.0 K
Dc 2.00000000 sec
IDC 1

===== CHANNEL f1 =====
SF01 400.320007 MHz
NUC1 1H
P1 12.60 usec
S- 65336
SF 400.330023 MHz
WDW EM
SSB 0
LB 0.50 Hz
GB 0
PC 1.00

```

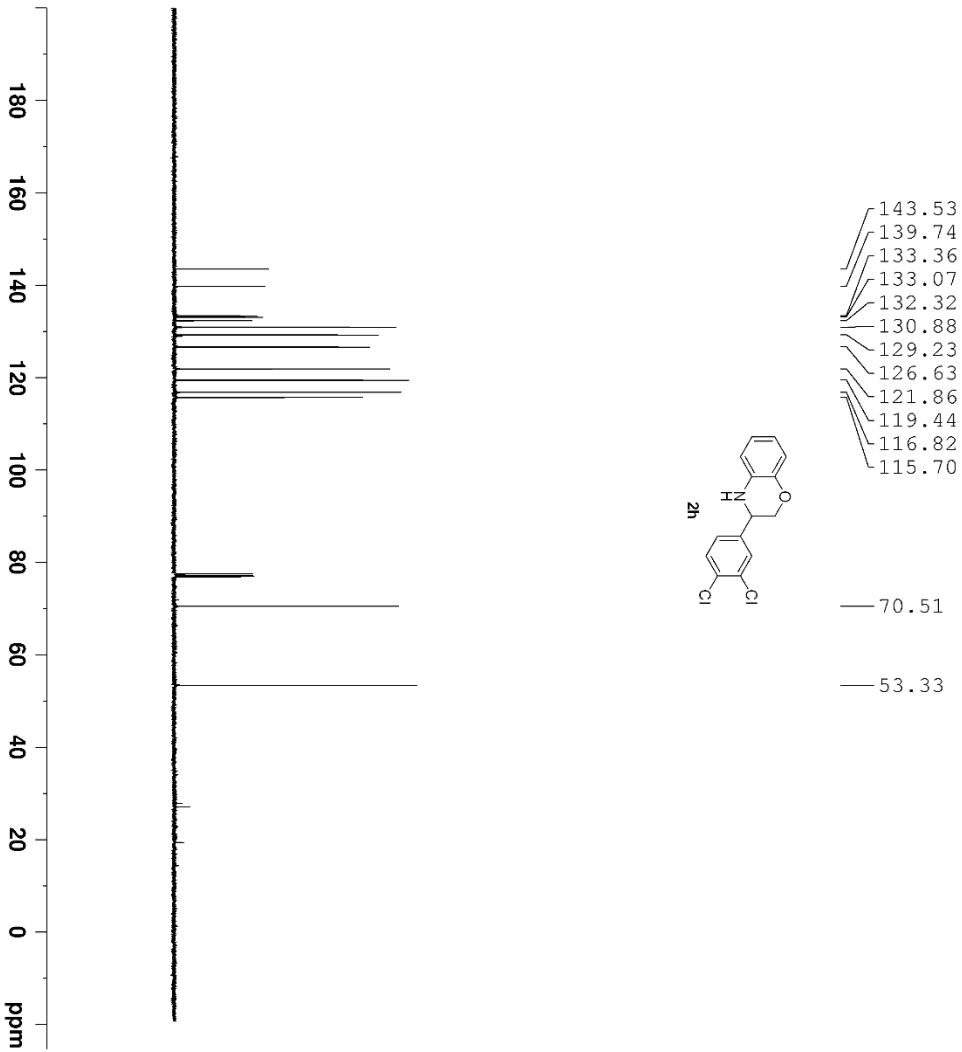

```

NAME          wsm-2-C-P
EXPNO         1444
PROCNO        1
Date_         20151123
Time_         16.04
INSTRUM       spect
PROBHD        5 mm PABBO BB/
PULPROG       zgpg30
TD            65536
SOLVENT       CDCl3
NS            63
DS            4
SWH           24038.461 Hz
FIDRES        0.366798 Hz
AQ            1.3631988 sec
RG            206.33
DW            20.800 usec
DE            6.50 usec
TE            298.1 K
D1            2.00000000 sec
D11           0.03000000 sec
ID0           1

===== CHANNEL f1 =====
SFO1          100.6504916 MHz
NUC1          13C
P1            10.00 usec
SI            32768
SF            100.6404219 MHz
WDW           EM
SSB           0
LB            1.00 Hz
GB            0
PC            1.40

```

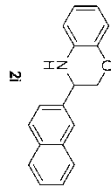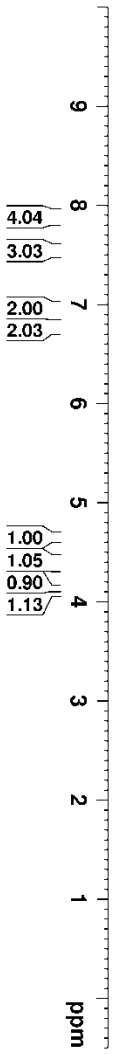

```

NAME wsm-2-H-P
EXPNO 1459
PROCNO 1
Date_ 20151127
Time 15.03
INSTRUM spect
PROBHD 5 mm PA3BO BB/
PULPROG zg30
TD 32768
SOLVENT CDCl3
NS 16
DS 0
SWH 8012.820 Hz
FIDRES 0.244532 Hz
AQ 2.0447731 sec
RG 140.59
DW 62.400 usec
DE 6.50 usec
TE 298.0 K
Dc 2.0000000 sec
IDC 1

===== CHANNEL f1 =====
SF01 400.2424716 MHz
NUC1 1H
P1 14.80 usec
S1 65536
SF 400.2400093 MHz
WDW EM
SSB 0
LB 0.30 Hz
GB 0
PC 1.00

```

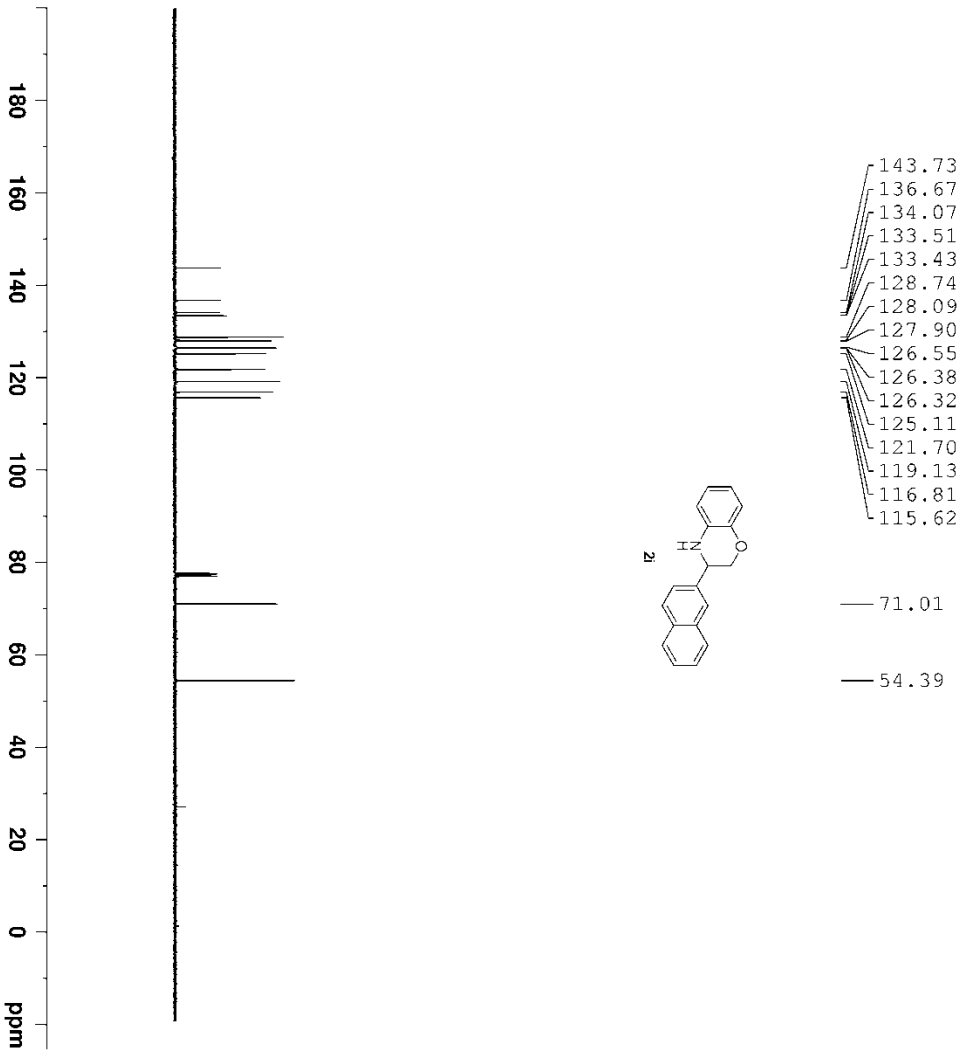

```

NAME          wsm-2-C-P
EXPNO         1659
PROCNO        1
Date_         20151127
Time_         11.00
INSTRUM       spect
PROBHD        5 mm PABBO BB/
PULPROG       zgpg30
TD            65536
SOLVENT       CDCl3
NS            28
DS            4
SWH           24038.461 Hz
FIDRES        0.366798 Hz
AQ            1.3631988 sec
RG            206.33
DW            20.800 usec
DE            6.50 usec
TE            298.5 K
D1            2.0000000 sec
D11           0.0300000 sec
ID0           1

----- CHANNEL f1 -----
SFO1         100.6304916 MHz
NUC1         13C
P1           10.00 usec
SI           32768
SF           100.6404244 MHz
WDW          FM
SSB          0
LB           1.00 Hz
GB           0
PC           1.40
  
```

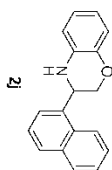

```

NAME          wsm-2-H-P
EXPNO         1443
PROCNO        2
Date_         20151127
Time_         15.07
INSTRUM       spect
PROBHD        5 mm PA3BO BB/
PULPROG       zg30
TD            32768
SOLVENT       CDCl3
NS            11
DS            0
SWH           8012.820 Hz
FIDRES        0.244532 Hz
AQ            2.0447731 sec
RG            102.73
RG            102.73
DW            62.400 usec
DE            6.50 usec
TE            298.0 K
Dc            2.0000000 sec
IDC           1

===== CHANNEL f1 =====
SF01          400.2424716 MHz
NUC1          1H
P1            14.80 usec
S1            65536
SF            400.2400092 MHz
WDW           EM
SSB           0
LB            0.30 Hz
GB            0
PC            1.00
  
```

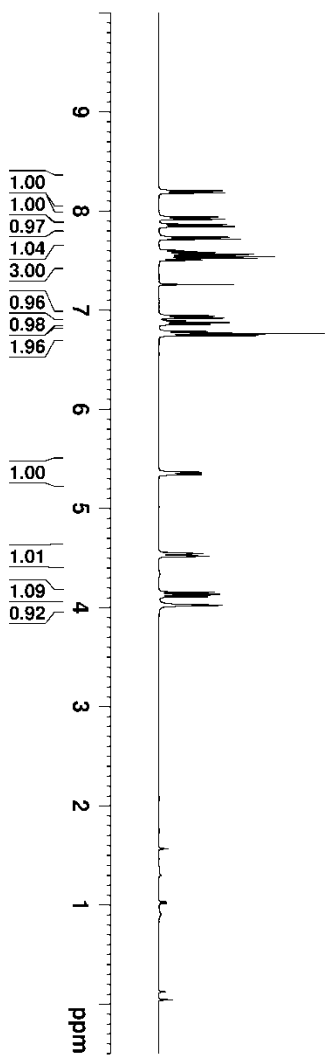

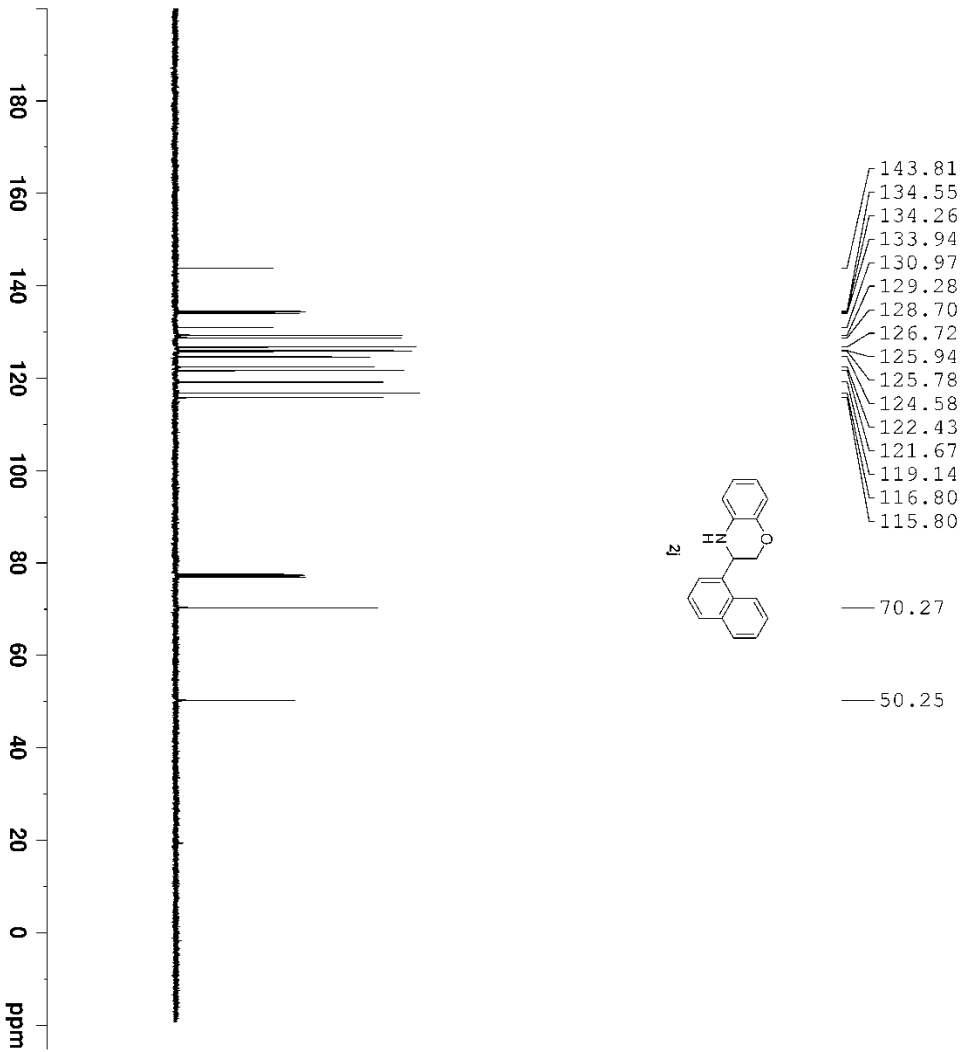

```

NAME: wsm-2-C-F
EXPNO: 1
PROCNO: 1
Date_ : 20151127
Time: 10.14
INSTRUM: spect
PROBHD: 5 mm PABBO BB/
PULPROG: zgpg30
TD: 65536
SOLVENT: CDCl3
NS: 31
DS: 4
SWH: 24038.461 Hz
FIDRES: 0.366798 Hz
AQ: 1.3631988 sec
RG: 206.33
DW: 20.800 usec
DE: 6.50 usec
TE: 298.5 K
D1: 2.0000000 sec
D11: 0.0300000 sec
ID0: 1
----- CHANNEL f1 -----
SFO1: 100.6304916 MHz
NUC1: 13C
P1: 10.00 usec
SI: 32768
SF: 100.6404282 MHz
WDW: FM
SSB: 0
LB: 1.00 Hz
GB: 0
PC: 1.40

```

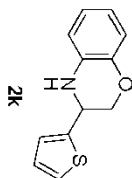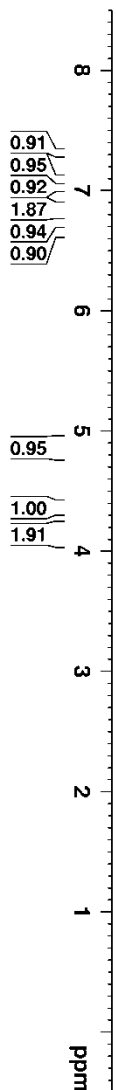

```

NAME wsm-2-H-P
EXPNO 1486
PROCNO 3
Date_ 20151210
Time 13.56
INSTRUM spect
PROBHD 5 mm PABUL13C
PULPROG zg30
TD 32768
SOLVENT CDCl3
NS 16
DS 0
SWH 12019.230 Hz
FIDRES 0.366798 Hz
AQ 1.3531988 se
RG 203
DW 41.600 us
DE 6.50 us
TE 300.0 K
D1 2.00000000 se
TD0 1

===== CHANNEL f1 =====
SFO1 400.1320007 MH
NUC1 1H
P1 12.60 us
SI 65536
SE 400.1300099 MH
WDW EM
SSB 0
LB 0
GB 0
PC 1.00

```



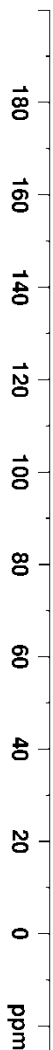

143.68  
142.86  
133.22  
127.05  
125.50  
124.98  
121.74  
119.53  
116.80  
115.79

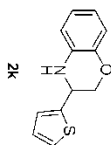

71.17

50.29

```

NAME: wsm-2-C-P
EXPNO: 1642
PROCNO: 1
Date_ 20151209
Time_ 7.25
INSTRUM spect
PROBHD 5 mm PABUL 13C
PULPROG zgpg30
TD 32768
SOLVENT CHCl3
NS 26
DS 0
SWH 25232.325 Hz
FIDRES 0.770646 Hz
AQ 0.6488364 sec
RG 114
RG 114
DW 19.800 usec
DE 6.50 usec
TE 300.0 K
D1 2.0000000 sec
D11 0.0300000 sec
ID0 1
----- CHANNEL f1 -----
SFO1 100.628298 MHz
NUC1 13C
P1 9.40 usec
SI 32768
SF 100.6127627 MHz
WDW FM
SSB 0
LB 1.00 Hz
GB 0
PC 1.40

```

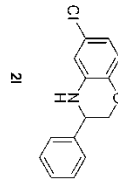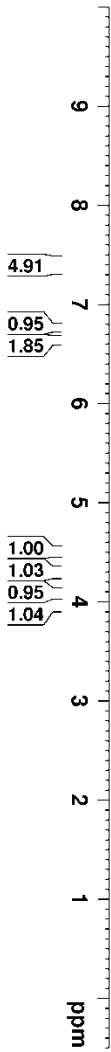

```

NAME wsm-2-H-P
EXPNO 1467
PROCNO 2
Date_ 20151210
Time 13.59
INSTRUM spect
PROBHD 5 mm PABUL-3C
PULPROG zg30
ID 32768
SOLVENT CDCl3
NS 16
DS 0
SWH 12019.230 Hz
FIDRES 0.366798 Hz
AQ 1.3631988 sec
RG 203
DW 41.600 usec
DE 6.50 usec
TE 300.0 K
Dc 2.0000000 sec
IDC 1

===== CHANNEL f1 =====
SF01 400.320007 MHz
NUC1 1H
P1 12.60 usec
S- 65336
SF 400.330098 MHz
WDW EM
SSB 0
LB 0.50 Hz
GB 0
PC 1.00
  
```

- 142.17
- 138.79
- 135.02
- 129.05
- 128.64
- 127.26
- 126.24
- 118.45
- 117.59
- 114.90
- 70.90
- 54.05

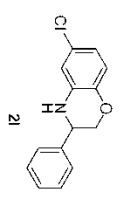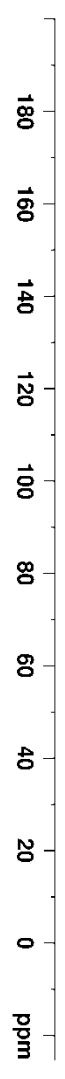

```

NAME: wsm-2-C-P
EXPNO: 1
PROCNO: 1
Date_ : 20151209
Time: 7.43
INSTRUM: spect
PROBHD: 5 mm PABUL 13C
PULPROG: zgpg30
TD: 32768
SOLVENT: CHCl3
NS: 38
DS: 0
SWH: 25232.325 Hz
FIDRES: 0.770646 Hz
AQ: 0.6488364 sec
RG: 128
DW: 19.800 usec
DE: 6.50 usec
TE: 300.0 K
D1: 2.00000000 sec
D11: 0.03000000 sec
ID0: 1
----- CHANNEL f1 -----
SFO1: 100.628298 MHz
NUC1: 13C
P1: 9.40 usec
SI: 32768
SF: 100.6127609 MHz
WDW: FM
SSB: 0
LB: 1.00 Hz
GB: 0
PC: 1.40

```

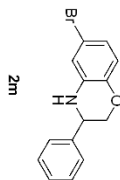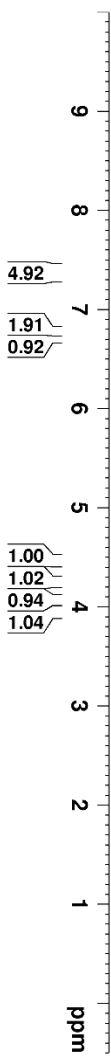

```

NAME wsm-2-H-P
EXPNO 1468
PROCNO 1
Date_ 20151215
Time 7.40
INSTRUM spect
PROBHD 5 mm BBDUL13C
PULPROG zg30
TD 32768
SOLVENT CDCl3
NS 16
DS 0
SWH 12019.230 Hz
FIDRES 0.366798 Hz
AQ 1.3631988 sec
RG 161
DE 41.600 usec
TE 6.50 usec
D1 300.0 K
D10 2.00000000 sec
ID0 1

===== CHANNEL f1 =====
SFO1 400.1320007 MHz
NUC1 1H
P1 12.60 usec
SI 65536
SF 400.1300160 MHz
WDW EM
SSB 0
LB 0.50 Hz
GB 0
PC 1.00
  
```

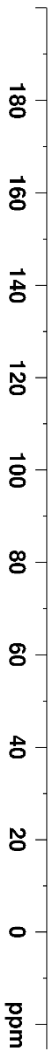

- 142.65
- 138.74
- 135.44
- 129.04
- 128.64
- 127.24
- 121.38
- 118.05
- 117.72
- 113.54
- 70.86
- 54.00

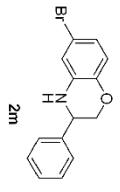

```

NAME          wsm-2-C-P
EXPNO         1448
PROCNO        1
Date_         20151209
Time_         7.46
INSTRUM       spect
PROBHD        5 mm PADD1 13C
PULPROG       zgpg30
TD            32768
SOLVENT       CDCl3
NS            36
DS            0
SWH           25252.525 Hz
FIDRES        0.770646 Hz
AQ            0.6488564 sec
RG            203
DW            19.800 usec
DE            6.50 usec
TE            300.0 K
D1            2.00000000 sec
D11           0.03000000 sec
ID0           1

===== CHANNEL f1 =====
SFO1          100.628298 MHz
NUC1          13C
P1            9.40 usec
SI            32768
SF            100.6127625 MHz
WDW           EM
SSB           0
LB            1.00 Hz
GB            0
PC            1.40
  
```

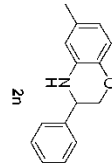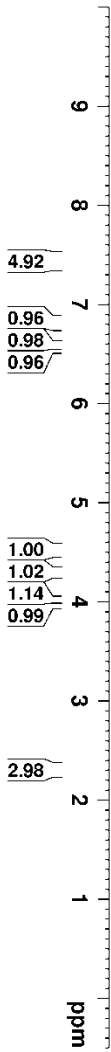

```

NAME          wsm-2-H-P
EXPNO         1453
PROCNO        1
Date_         20151127
Time_         14.50
INSTRUM       spect
PROBHD        5 mm PABBO BB/
PULPROG       zg30
TD            32768
SOLVENT       CDCl3
NS            16
DS            0
SWH           8012.820 Hz
FIDRES        0.244532 Hz
AQ            2.0447731 sec
RG            80.72
DW            62.400 usec
DE            6.50 usec
TE            298.0 K
Dc            2.0000000 sec
IDC           1

===== CHANNEL f1 =====
SF01          400.2424716 MHz
NUC1          1H
P1            14.80 usec
S1            65536
SF            400.2400932 MHz
WDW           EM
SSB           0
LB            0.30 Hz
GB            0
PC            1.00
  
```

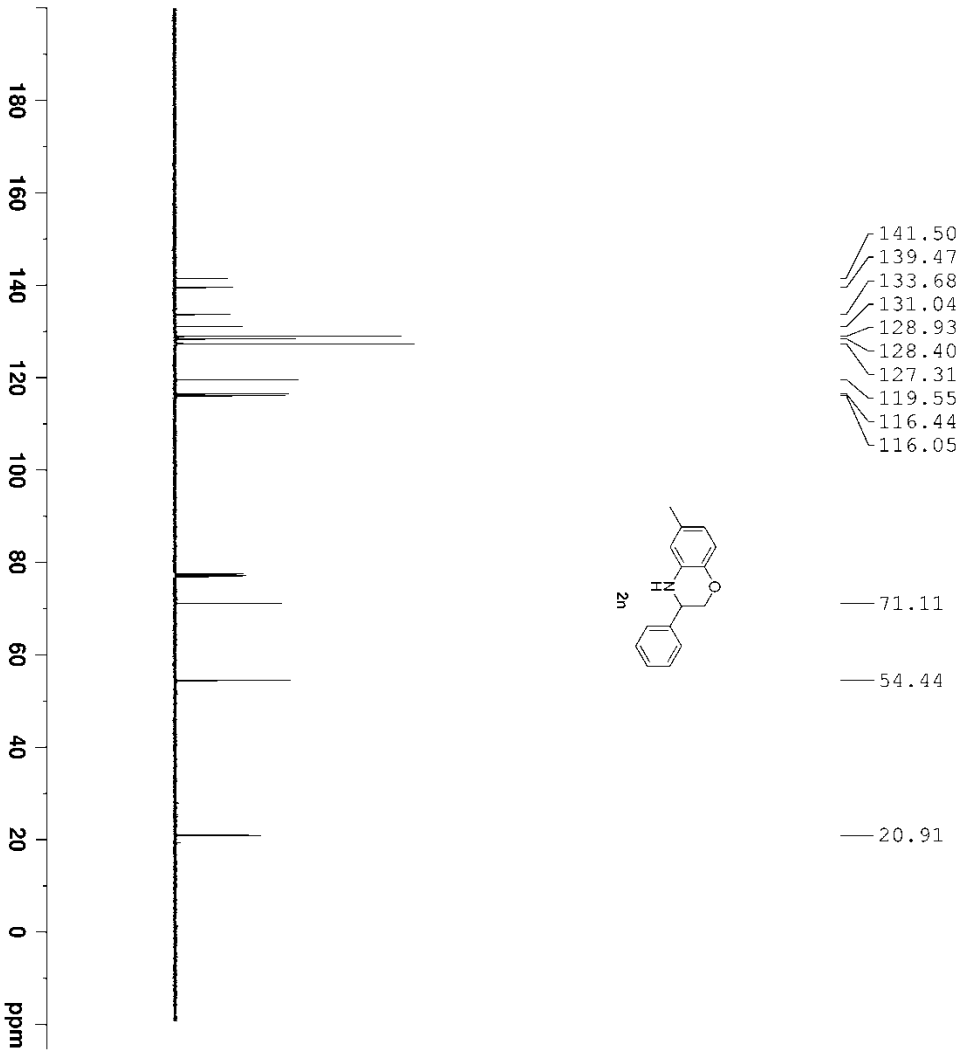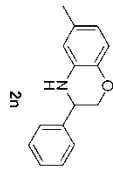

```

NAME: wsm-2-C-P
EXPNO: 1653
PROCNO: 2
Date_ : 20151127
Time: 10.44
INSTRUM: spect
PROBHD: 5 mm PABBO BB/
PULPROG: zgpg30
TD: 65536
SOLVENT: CDCl3
NS: 35
DS: 4
SWH: 24038.461 Hz
FIDRES: 0.366798 Hz
AQ: 1.3631988 sec
RG: 206.33
DW: 20.800 usec
DE: 6.50 usec
TE: 298.3 K
D1: 2.00000000 sec
D11: 0.03000000 sec
ID0: 1
----- CHANNEL f1 -----
SFO1: 100.6304916 MHz
NUC1: 13C
P1: 10.00 usec
SI: 32768
SF: 100.6404229 MHz
WDW: FM
SSB: 0
LB: 1.00 Hz
GB: 0
PC: 1.40

```

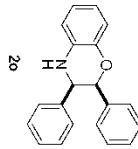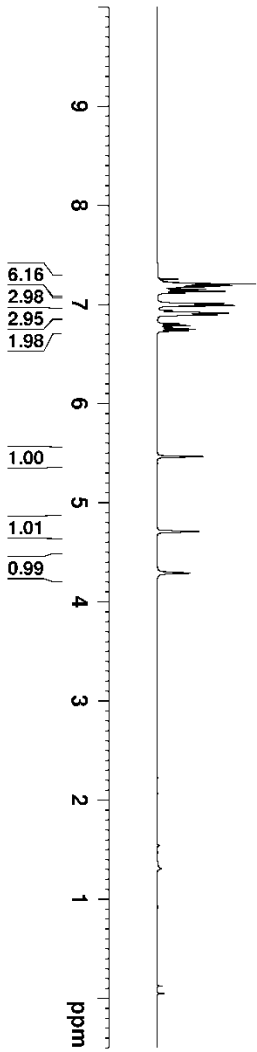

```

NAME          wsm-2-H-P
EXPNO         1474
PROCNO        2
Date_         20160103
Time_        7.30
INSTRUM       spect
PROBHD        5 mm PABDUL
PULPROG       zg30
ID            32768
SOLVENT       CDCl3
NS            13
DS            0
SWH           12019.230 Hz
FIDRES        0.366798 Hz
AQ            1.3631988 sec
RG            101
DW            41.600 usec
DE            6.50 usec
TE            300.0 K
Dc            2.0000000 sec
IDC           1

===== CHANNEL f1 =====
SF01          400.320007 MHz
NUC1          1H
P1            12.60 usec
S1            65336
SF            400.3300100 MHz
WDW           EM
SSB           0
LB            0.50 Hz
GB            0
PC            1.00
  
```



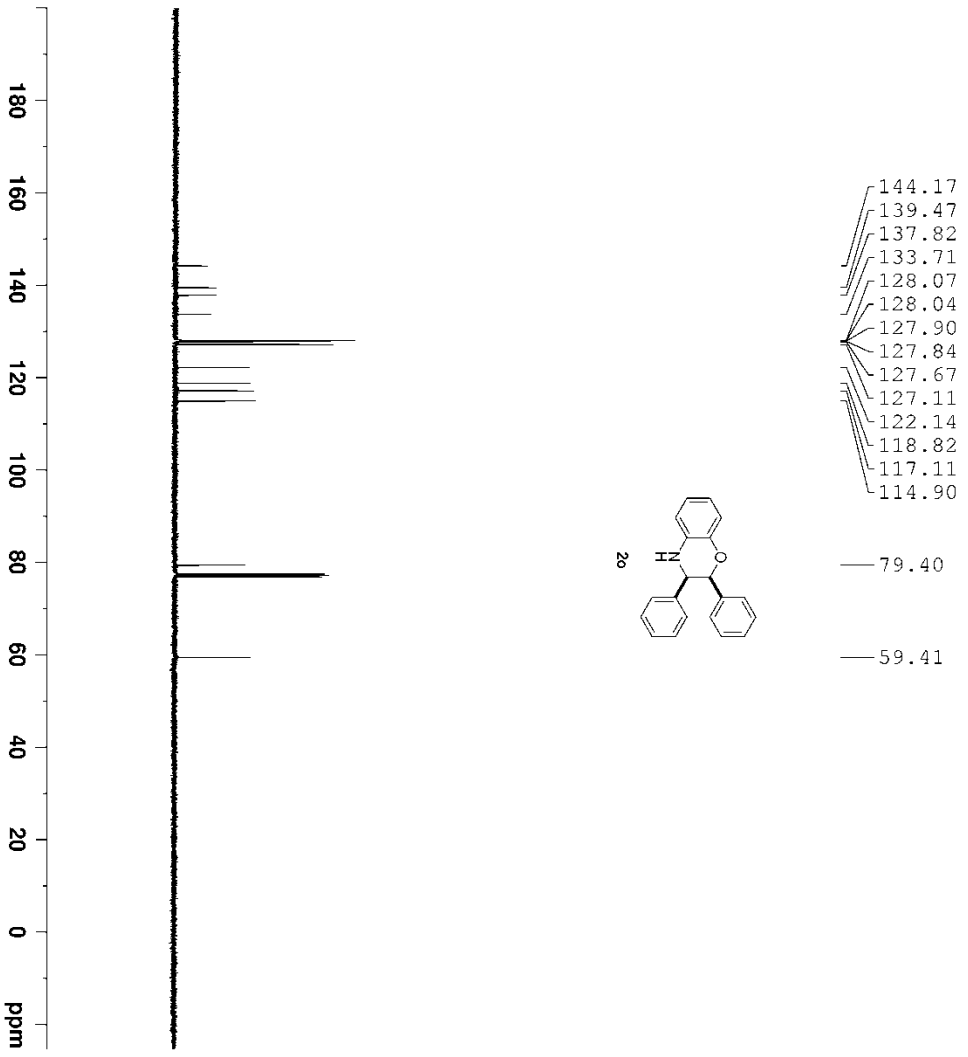

```

NAME          wsm-2-C-P
EXPNO         1
PROCNO       1
Date_        20160105
Time         7.31
INSTRUM      spect
PROBHD       5 mm PDDUL 13C
PULPROG      zgpg30
TD           32768
SOLVENT      CDCl3
NS           56
DS           0
SWH          25232.325 Hz
FIDRES       0.770646 Hz
AQ           0.6488364 sec
RG           161
DW           19.800 usec
DE           6.50 usec
TR           300.0 K
D1           2.0000000 sec
D11          0.0300000 sec
ID0          1
  
```

```

----- CHANNEL f1 -----
SFO1         100.628298 MHz
NUC1         13C
P1           9.40 usec
SI           32768
SF           100.6127556 MHz
WDW          FM
SSB          0
LB           1.00 Hz
GB           0
PC           1.40
  
```

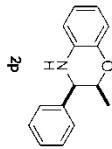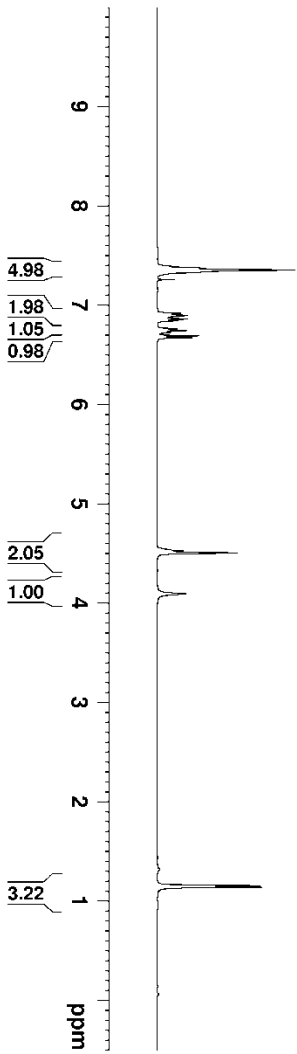

```

NAME          wsr-2-H-P
EXPNO         1487
PROCNO       1
Date_         20060107
Time         11.34
INSTRUM      spect
PROBHD       5 mm P4DU-13C
PULPROG      zg30
TD           32768
SOLVENT      CDCl3
NS           6
DS           0
SWH          12019.230 Hz
FIDRES       0.356798 Hz
AQ           1.3631988 sec
RG           57
DW           41.600 usec
DE           6.50 usec
TE           300.0 K
D1           2.00000000 sec
CD0          -

===== CHANNEL f1 =====
SF01         400.132007 MHz
NUC1         1H
P1           12.60 usec
SI           65536
SF           400.1300099 MHz
WDW          EM
SSB          0
LB           0.50 Hz
GB           0
PC           1.00
  
```

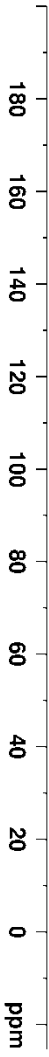

- 143.01
- 140.26
- 133.37
- 128.69
- 127.90
- 127.62
- 121.69
- 118.81
- 117.10
- 115.03

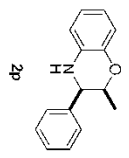

- 73.43
- 57.81
- 15.69

```

NAME          wsm-2-C-P
EXPNO         1487
PROCNO       1
Date_         20160107
Time_        11.36
INSTRUM      spect
PROBHD       5 mm PDDTL 13C
PULPROG      zgpg30
TD           32768
SOLVENT      CDCl3
NS           38
DS           0
SWH          25252.525 Hz
FIDRES       0.770646 Hz
AQ           0.6488564 sec
RG           161
CW           19.800 usec
CF           6.50 usec
TF           300.0 K
C1           2.06000000 sec
C11          0.03600000 sec
L30          1

```

```

----- CHANNEL f1 -----
SF01         100.628298 MHz
NUC1         13C
P1           9.40 usec
SI           32768
SF           100.6127586 MHz
WDW          FM
SSB          0
LB           1.00 Hz
GB           0
PC           1.40

```
